# Supplementary material
Source: publisher figshare collection journal article supplement (https://geolsoc.figshare.com/ndownloader/files/26836820)
Supplement: Supplementary file 1 [file 26836820]

## Sheet: SD Table 1 MBL Age Results
Latitude	Longitude	Volcanic Field	Volcano/Region				Sample I.D.	Rock type2	Technique	Irrad. #	NMGRL Lab#	sample (meth.)	Type		Published Preferred				Corrected Preferred		Field Description	Ref.	Ref	Age Correction Method	Original FCs age in calculation
															Age ± 2 s.d.				Age ± 2 s.d.
				Eastern MBL Volcanic Field											(Ma)				(Ma)
					Mt. Murphy
						Murphy Shield Building, Bucher Peak
-75.3397	-110.858	Eastern MBL	Murphy				W85-060	bas	ArAr	NM-43	5979-01	gms (F)	Isochron	5.17968	±	0.177319		5.17968	±	0.177319	N side, lava, 60 m below summit ice cap, ~2390m	21	this study	no correction
-75.3864	-111.112	Eastern MBL	Murphy				90-72	bas	ArAr	NM-17	1852	gms (F)	Plateau	7.05027	±	0.05		7.14169	±	0.05	West Cliff mesa, light gray lava, 2% plagioclase	21	this study	Convert FCs to 28.201	27.84
-75.3694	-110.895	Eastern MBL	Murphy				90-001	bas	ArAr	NM-43	5939-01	gms (F)	Isochron	7.63696	±	0.137656		7.63696	±	0.137656	SW ridge, bomb interior, highest cone, trachyte-benmorite?, 10% xtal, CPX, plag, amp?, porphy lava, spatter/flow, 5% pyx,ol,plag	21	this study	no correction	27.84
-75.3558	-110.865	Eastern MBL	Murphy				90-005	ben	ArAr	NM-43	5941-01	gms (F)	Isochron	8.48843	±	0.459435		8.48843	±	0.459435	SW ridge, lava underlying tillite	21	this study	no correction
-75.388	-111.149	Eastern MBL	Murphy				90-34	bas	ArAr	NM-1	604	gms (F)	Plateau	8.22	±	0.04		8.32661	±	0.04	main cliff, 50 m thick felsic dome 725-775masl	18	Wilch and McIntosh (2002)	Convert FCs to 28.201	27.84
-75.388	-111.149	Eastern MBL	Murphy				90-37	bas	ArAr	NM-1	704	gms (F)	Weighted Mean	8.8	±	0.2		8.91414	±	0.2	main cliff, thin (subaerial?) lava at 685m	18	Wilch and McIntosh (2002)	Convert FCs to 28.201	27.84
-75.388	-111.149	Eastern MBL	Murphy				90-37	bas	ArAr	NM-1	61	gms (F)	Weighted Mean	8.86	±	0.15		8.97491	±	0.15	main cliff, thin (subaerial?) lava at 685m	18	Wilch and McIntosh (2002)	Convert FCs to 28.201	27.84
-75.388	-111.149	Eastern MBL	Murphy				90-37	bas	ArAr					8.84	±	0.13		8.95465	±	0.13	Mean age (n= 2)	18	Wilch and McIntosh (2002)	Convert FCs to 28.201	27.84
-75.388	-111.149	Eastern MBL	Murphy				90-39	bas	ArAr	NM-1	63	gms (F)	Plateau	9.26	±	0.14		9.3801	±	0.14	main cliff, lava assoc. w/hyaloclastite 555m	18	Wilch and McIntosh (2002)	Convert FCs to 28.201	27.84
-75.388	-111.149	Eastern MBL	Murphy				90-39	bas	ArAr	NM-1	705	gms (F)	Weighted Mean	9.03	±	0.12		9.14712	±	0.12	main cliff, lava assoc. w/hyaloclastite 555m	18	Wilch and McIntosh (2002)	Convert FCs to 28.201	27.84
-75.388	-111.149	Eastern MBL	Murphy				90-39	bas	ArAr	NM-1		gms (F)		9.13	±	0.24		9.24842	±	0.24	Mean age (n= 2)	18	Wilch and McIntosh (2002)	Convert FCs to 28.201	27.84
-75.388	-111.149	Eastern MBL	Murphy				90-33	basn	ArAr	NM-1	703	gms (F)	Weighted Mean	9.07	±	0.09		9.18764		0.09	main cliff, 1.5 m lava (striated) 527m	18	Wilch and McIntosh (2002)	Convert FCs to 28.201	27.84
-75.388	-111.149	Eastern MBL	Murphy				90-33	basn	ArAr	NM-1	62	gms (F)	Plateau	9.39	±	0.12		9.51179		0.12	main cliff, 1.5 m lava (striated) 527m	18	Wilch and McIntosh (2002)	Convert FCs to 28.201	27.84
-75.388	-111.149	Eastern MBL	Murphy				90-33	basn	ArAr					9.19	±	0.32		9.30919	±	0.32	Mean age (n= 2)	18	Wilch and McIntosh (2002)	Convert FCs to 28.201	27.84
-75.388	-111.149	Eastern MBL	Murphy				90-50	basn	ArAr	NM-1	707	gms (F)	Plateau	9.35	±	0.13		9.47127		0.13	west cliff, pillow 3m above tillite, 510 m	18	Wilch and McIntosh (2002)	Convert FCs to 28.201	27.84
-75.388	-111.149	Eastern MBL	Murphy				90-50	basn	ArAr	NM-1	706	gms (F)	Plateau	9.32	±	0.13		9.44088		0.13	west cliff, pillow 3m above tillite, 510 m	18	Wilch and McIntosh (2002)	Convert FCs to 28.201	27.84
-75.388	-111.149	Eastern MBL	Murphy				90-50	basn						9.34	±	0.1		9.46114	±	0.1	Mean age (n= 2)	18	Wilch and McIntosh (2002)	Convert FCs to 28.201	27.84
		Eastern MBL	Murphy			Sechrist Peak
-75.3879	-111.028	Eastern MBL	Murphy				90-69	bas	ArAr	NM-17	1860-01	gms (F)	Isochron	0.599	±	0.086		0.606769	±	0.086	west flank	21	this study	Convert FCs to 28.201	27.84
-75.3879	-111.028	Eastern MBL	Murphy				90-139	bas	ArAr	NM-17	1866-01	gms (F)	Isochron	0.601	±	0.028		0.608795	±	0.028	dense intrusive interior	21	this study	Convert FCs to 28.201	27.84
-75.3879	-111.028	Eastern MBL	Murphy															0.608601	±	0.0266244	Mean age (n= 2)	18	Wilch and McIntosh (2002)	Convert FCs to 28.201	27.84
		Eastern MBL	Murphy			Murphy post- Shield Building, Bucher Peak
-75.3827	-110.968	Eastern MBL	Murphy				90-007	bas	ArAr	NM-43	5942-01	gms (F)	Isochron	1.8643	±	0.0881279		1.8643	±	0.0881279	basaltic bomb, lowest cinder cone	21	this study	no correction
-75.3796	-110.939	Eastern MBL	Murphy				W85-045	bas	ArAr	NM-43	5975-01	gms (F)	Isochron	2.71761	±	0.0762467		2.71761	±	0.0762467	basaltic in-situ flow	21	this study	no correction
-75.3809	-110.942	Eastern MBL	Murphy				90-002	basn	ArAr	NM-43	5940-01	gms (F)	Isochron	3.65457	±	0.158946		3.65457	±	0.158946	basaltic flow, middle xeno-bearing cone	21	this study	no correction
		Eastern MBL	Murphy			Murphy Shield Building, Bucher South Face
-75.3777	-110.77	Eastern MBL	Murphy				90-145	trach?	ArAr	NM-43	6045-01	gms (F)	Isochron	5.95569	±	0.29821		5.95569	±	0.29821	dense black bomb interior, high in spatter-fed flow	21	this study	no correction
-75.3777	-110.77	Eastern MBL	Murphy				90-143	haw	ArAr	nm-43	5952-01	gms (F)	Isochron	7.27561	±	0.116467		7.27561	±	0.116467	dense spatter-fed lava, 15% pyx+plag+ol	21	this study	no correction
-75.3777	-110.77	Eastern MBL	Murphy				90-144	phon	ArAr	nm-43	5953-01	gms (F)	Isochron	7.03857	±	0.0990293		7.03857	±	0.0990293	green trachtye fragment	21	this study	no correction
-75.3516	-110.668	Eastern MBL	Murphy				90-146	trach	ArAr	NM-43	5954-01	gms (F)	Isochron	8.71061	±	0.161921		8.71061	±	0.161921	trachyte, W end Hawkins/Murphy saddle	21	this study	no correction
		Eastern MBL	Murphy			Kay Peak
-75.2493	-110.941	Eastern MBL	Murphy				90-123	mug	ArAr	RD84			Plateau	8.83	±	0.03		8.94453	±	0.03	aphanitic vesicular lava	21	this study	Convert FCs to 28.201	27.84
-75.2363	-110.954	Eastern MBL	Murphy				90-112	trach?	ArAr	NM-43	6043-01	gms (F)	Isochron	8.90216	±	0.108531		8.90216	±	0.108531	2nd lowest unit, trachytic? lava, porphy w/ 4% ol, cpx, plag	21	this study	no correction
-75.2363	-110.954	Eastern MBL	Murphy				90-115	bas	ArAr	NM-43	5945-01	gms (F)	Isochron	6.92845	±	0.491848		6.92845	±	0.491848	crystal rich basaltic lava, 15% ol, cpx, plag	21	this study	no correction
		Eastern MBL	Murphy			Grew Peak
-75.2913	-110.629	Eastern MBL	Murphy				90-127	basn	ArAr	NM-43	5948-01	gms (F)	Isochron	4.30971	±	0.552536		4.30971	±	0.552536	aphyric dike in epiclast/hyaloclastite	21	this study	no correction
-75.2913	-110.629	Eastern MBL	Murphy				90-130	mug	ArAr	NM-43	5949-01	gms (F)	Isochron	5.06889	±	0.155382		5.06889	±	0.155382	aphyric pillow basalt	21	this study	no correction
-75.2913	-110.629	Eastern MBL	Murphy				90-131	mug?	ArAr	NM-43	5950-01	gms (F)	Isochron	5.80868	±	0.444948		5.80868	±	0.444948	porphy lava, ol? plag, pyx, within hyalo/pillow unit	21	this study	no correction
		Eastern MBL	Murphy			Eisberg Head
-75.207	-110.463	Eastern MBL	Murphy				90-133	haw	ArAr	NM-43	5951-01	gms (F)	Isochron	5.50934	±	0.404033		5.50934	±	0.404033	JLS sample MB58.3B	21	this study	no correction
		Eastern MBL	Murphy			Callender Peak
-75.2842	-110.252	Eastern MBL	Murphy				90-153	basn	ArAr	NM-43	5985-01	gms (F)	Isochron	6.21952	±	0.349323		6.21952	±	0.349323	lower lava, aphyric, coarse plag matrix	21	this study	no correction
-75.2842	-110.252	Eastern MBL	Murphy				90-149	bas	ArAr	NM-43	6046-01	gms (F)	Isochron	5.92838	±	0.348286		5.92838	±	0.348286	lowest exposed lava, aphyric	21	this study	no correction
		Eastern MBL	Murphy			Hawkins Peak
-75.42	-110.53	Eastern MBL	Murphy				90-148	basn?	ArAr	NM-43	6067-01	gms (F)	Isochron	5.28496	±	0.0626942		5.28496	±	0.0626942	freshest available bomb interior, 1% plag	21	this study	no correction
		Eastern MBL	Murphy
		Eastern MBL	Murphy			Satellite Nunataks
		Eastern MBL	Murphy			Icefall Nunatak
-75.387	-111.246	Eastern MBL	Murphy				90-47	basn	ArAr	NM-17	1859	gms (F)	Plateau	6.52	±	0.13		6.60456	±	0.13	high subaerial lava	18	Wilch and McIntosh (2002)	Convert FCs to 28.201	27.84
-75.387	-111.246	Eastern MBL	Murphy				90-48	basn	ArAr	NM-17	1853	gms (F)	Isochron	6.8	±	0.2		6.8882	±	0.2	lobe in low hyaloclastite	18	Wilch and McIntosh (2002)	Convert FCs to 28.201	27.84
		Eastern MBL	Murphy			Turtle Peak
-75.3703	-111.292	Eastern MBL	Murphy				90-94	bas	ArAr	NM-17	1857	gms (F)	Plateau	4.7	±	0.15		4.76096	±	0.15	v. vesicular pahoehoe top	18	Wilch and McIntosh (2002)	Convert FCs to 28.201	27.84
-75.3703	-111.292	Eastern MBL	Murphy				90-92	bas	ArAr	NM-17	1861	gms (F)	Weighted Mean	5.65	±	0.23		5.72328	±	0.23	upper pillow	18	Wilch and McIntosh (2002)	Convert FCs to 28.201	27.84
-75.3703	-111.292	Eastern MBL	Murphy				90-87	basn	ArAr	NM-43	6064	gms (F)	Isochron	5.95	±	0.6		5.95	±	0.6	lower flow-foot breccia, angular clasts	18	Wilch and McIntosh (2002)	no correction
		Eastern MBL	Murphy			Hedin Nunatak
-75.3253	-111.303	Eastern MBL	Murphy				90-99	basn	ArAr	RD84	n.d.	gms (F)	Isochron	6.2	±	0.24		6.28041	±	0.24	subaerial lava, upper tuya	18	Wilch and McIntosh (2002)	Convert FCs to 28.201	27.84
-75.3253	-111.303	Eastern MBL	Murphy				90-110	basn	ArAr	NM-17	1862-01	gms (F)	Isochron	6.5	±	0.12		6.5843	±	0.12	lowest tindar	18	Wilch and McIntosh (2002)	Convert FCs to 28.201	27.84
		Eastern MBL	Murphy			Dorrel Rock
-75.4436	-111.378	Eastern MBL	Murphy				90-105	gabbro	ArAr	RD84		ano (F)	Plateau	35.05	±	0.12		35.5046	±	0.12	gabbro intrusion	21	this study	Convert FCs to 28.201	27.84
-75.4436	-111.378	Eastern MBL	Murphy				90-105	gabbro	ArAr	RD84		ano (F)	Isochron	34.38	±	0.45		34.8259	±	0.45	gabbro intrusion	21	this study	Convert FCs to 28.201	27.84
-75.4436	-111.378	Eastern MBL	Murphy				90-105	gabbro	ArAr	RD85		ano (F)	Plateau	34.47	±	0.12		34.9171	±	0.12	gabbro intrusion	21	this study	Convert FCs to 28.201	27.84
		Eastern MBL																35.1976	±	0.4201	Mean age (n-3)
-75.4436	-111.378	Eastern MBL	Murphy				60A	gabbro	ArAr			bio (L)	Plateau	>34.15	±	0.22		>34.46	±	0.22	gabbro intrusion	13	Rocchi et al. (2006)	27.95	27.95
-75.4436	-111.378	Eastern MBL	Murphy				60A	gabbro	ArAr			amph L)	Plateau	>36.72	±	0.26		>37.05	±	0.26	gabbro intrusion	13	Rocchi et al. (2006)	27.95	27.95
-75.4436	-111.378	Eastern MBL	Murphy				60C	ben				gms (L)	Integrated Age	36.8	±	0.3					dike	13	Rocchi et al. (2006)	27.95	27.95
-75.4436	-111.378	Eastern MBL	Murphy				60C	ben	ArAr			amph (L)	Isochron	33.63	±	0.24		33.93	±	0.24	dike	13	Rocchi et al. (2006)	27.95	27.95
		Eastern MBL	Murphy				60D	trach	ArAr			amph (L)	Isochron	35.49	±	0.32		35.81	±	0.32	dike	13	Rocchi et al. (2006)	27.95	27.95
		Eastern MBL	Kohler			Kohler Range
-75.1158	-113.97	Eastern MBL	Kohler				84	bas	Kar	n.d.	n.d	wr		9.8	±	3.4		10.0607	±	3.4	thin lava on basement- proximal to tuff breccia	1	LeMasurier (1972)	Decay constant- Dalrymple (1979)
		Eastern MBL	Takahe		Mt. Takahe
		Eastern MBL	Takahe			Summit caldera
-76.3103	-112.204	Eastern MBL	Takahe				W85009		ArAr	NM-36	5342	ano (L)	Weighted Mean	0.008198	±	0.00538622		0.0083043	±	0.00538622	Bucher Rim(S) pumice and obsidian bombs	20	Wilch et al. (1999)	Convert FCs to 28.201	27.84
-76.3146	-112.182	Eastern MBL	Takahe				W85013		ArAr	NM-36	5379	ano (L)	Weighted Mean	0.0933066	±	0.00793173		0.0945165	±	0.00793173	Bucher Rim(N) lava beneath welded fall	20	Wilch et al. (1999)	Convert FCs to 28.201	27.84
-76.3051	-112.225	Eastern MBL	Takahe				W85015		ArAr	NM-36	5372	ano (L)	Weighted Mean	0.102003	±	0.00737125		0.103325	±	0.00737125	Bucher Rim(N), welded fall obsidian	20	Wilch et al. (1999)	Convert FCs to 28.201	27.84
-76.3051	-112.225	Eastern MBL	Takahe				W85015		FT			glass		0.135	±	0.156		0.135	±	0.156	Bucher Rim(N), welded fall obsidian	10	Palais et al. (1988)
-76.2763	-112.356	Eastern MBL	Takahe				MT85006		ArAr	NM-36	5357	ano (L)	Weighted Mean	0.154145	±	0.00819686		0.156143	±	0.00819686	2835m outcrop lava overlain by welded fall	20	Wilch et al. (1999)	Convert FCs to 28.201	27.84
-76.2763	-112.356	Eastern MBL	Takahe				W85022		ArAr	NM-36	5343	ano (L)	Weighted Mean	0.167195	±	0.013796		0.169363	±	0.013796	Bucher rim(S), lava	20	Wilch et al. (1999)	Convert FCs to 28.201	27.84
-76.2763	-112.356	Eastern MBL	Takahe				W85019		FT			glass		0.175	±	0.176		0.175	±	0.176	Bucher rim, obsidian in moraine	10	Palais et al. (1988)
-76.3105	-112.207	Eastern MBL	Takahe				W85011		ArAr	NM-36	5369	ano (L)	Weighted Mean	0.192004	±	0.00630575		0.194494	±	0.00630575	Bucher Rim(S), 10 m lava over W85-09	20	Wilch et al. (1999)	Convert FCs to 28.201	27.84
		Eastern MBL	Takahe			Post-shield flank outcrops
		Eastern MBL				Oeschger Bluff
-76.4002	-111.826	Eastern MBL	Takahe				MT10	basn	ArAr	NM-37	5391	gms (F)	Plateau	0.007	±	0.013		0.00709077	±	0.013	pahoehoe lava	16	Wilch (1997)	Convert FCs to 28.201	27.84
		Eastern MBL				Roper Point
-76.3153	-112.775	Eastern MBL	Takahe				MT85-3	basn	ArAr	NM-37	5388	gms (F)	Plateau	0.104	±	0.028		0.105349	±	0.028	lava	16	Wilch (1997)	Convert FCs to 28.201	27.84
-76.3153	-112.775	Eastern MBL	Takahe				98-083	trach	ArAr	NM-120	51410	ano (L)	Plateau	0.113104	±	0.00211646		113.104	±	2.11646	lapilli in moraine	21	this study	no correction
-76.3153	-112.775	Eastern MBL	Takahe				98-086	trach	ArAr	NM-126	51411	ano (L)	Plateau	0.137698	±	0.00300578		137.698	±	3.00578	fine ash in moraine	21	this study	no correction
-76.3153	-112.775	Eastern MBL	Takahe				98-087	trach	ArAr	NM-126	51407	ano (L)	Plateau	0.193917	±	0.00950501		193.917	±	9.50501	lapilli in moraine	21	this study	no correction
		Eastern MBL
		Eastern MBL				Cadenazzi Rock
-76.3073	-112.656	Eastern MBL	Takahe				MT85-3	basn	ArAr	NM-37	5388	gms (F)	Plateau	0.0891455	±	0.00413736		0.105349	±	0.028	lava	21	this study	no correction
		Eastern MBL
		Eastern MBL				Steuri Glacier
-76.3545	-112.438	Eastern MBL	Takahe				MT85-9	trach	ArAr	NM-37	5339	gms (F)	Plateau	0.045	±	0.007		0.0455835	±	0.007	lava	16	Wilch (1997)	Convert FCs to 28.201	27.84
		Eastern MBL				Gill Bluff
-76.2326	-112.546	Eastern MBL	Takahe				98-039	trach	ArAr	nm-108	50378-01	ano (L)	Plateau	0.0259527	±	0.00513114		0.0259527	±	0.00513114	SW-facing outcrop, lithic clast from debris-flow (remobilized hyaloclastite)	21	this study	no correction
-76.2249	-112.519	Eastern MBL	Takahe				98-017	trach	ArAr	nm-108	50358-01	ano (L)	Plateau	0.021507	±	0.00329527		0.021507	±	0.00329527	NE-facing outcrop, pillow hyaloclastite	21	this study	no correction
-76.2198	-112.557	Eastern MBL	Takahe				98-024	trach	ArAr	nm-108	50361-03	ano (L)	Plateau	0.0219538	±	0.0036993		0.0219538	±	0.0036993	NE-facing outcrop, pillow hyaloclastite	21	this study	no correction
-76.2224	-112.532	Eastern MBL	Takahe				98-027	trach	ArAr	nm-108	50362-01	ano (L)	Plateau	0.0201865	±	0.0036731		0.0201865	±	0.0036731	NE-facing outcrop, debris Mixed/pillow hyaloclastite	21	this study	no correction
		Eastern MBL	Takahe						ArAr					0.0212	±	0.0041		0.0212	±	0.0041	Mean age (n=3)			no correction
		Eastern MBL				Stauffer Bluff
-76.1701	-111.801	Eastern MBL	Takahe				98-055	haw	ArAr	nm-108	50368-01	gms (F)	Plateau	0.0694865	±	0.00960751		0.0694865	±	0.00960751	pillow hyaloclastite below passage zone	21	this study	no correction
-76.1776	-111.821	Eastern MBL	Takahe				98-058	haw	ArAr	nm-108	50372-01	gms (F)	Plateau	0.0613355	±	0.010489		0.0613355	±	0.010489	juvenile bomb from accretionary lapilli hyalotuff	21	this study	no correction
-76.1689	-111.803	Eastern MBL	Takahe				98-064	haw	ArAr	nm-108	50373-01	gms (F)	Plateau	0.0567367	±	0.0193923		0.0567367	±	0.0193923	sample from pillow hyaloclastite just below passage zone	21	this study	no correction
		Eastern MBL	Takahe						ArAr					0.0647044	±	0.0133		0.0647044	±	0.0133	Mean age (n=3)			no correction
		Eastern MBL				Moll Spur
-76.3784	-112.188	Eastern MBL	Takahe				98-100-01	trach	ArAr	nm-108	50363-01	ano (L)	Plateau	0.0196909	±	0.0121393		0.0196909	±	0.0121393	Upper sequence, pillow hyaloclastite, pillow interior	21	this study	no correction
-76.3784	-112.188	Eastern MBL	Takahe				98-100-05	trach	ArAr	nm-108	50363-05	ano (L)	Plateau	0.022849	±	0.00313253		0.022849	±	0.00313253	Upper sequence, pillow hyaloclastite, pillow interior	21	this study	no correction
-76.3784	-112.188	Eastern MBL	Takahe				98-100-06	trach	ArAr	nm-108	50363-06	ano (L)	Plateau	0.0177468	±	0.00393997		0.0177468	±	0.00393997	Upper sequence, pillow hyaloclastite, pillow interior	21	this study	no correction
-76.3784	-112.188	Eastern MBL	Takahe				98-100-07	trach	ArAr	nm-108	50363-07	ano (L)	Plateau	0.0199638	±	0.0146604		0.0199638	±	0.0146604	Upper sequence, pillow hyaloclastite, pillow interior	21	this study	no correction
-76.3784	-112.188	Eastern MBL	Takahe				98-100	trach	ArAr	nm-108	50363	ano (L)		0.02083	±	0.00474		0.02083	±	0.00474	Mean age (n=4)	21	this study	no correction
-76.38	-112.187	Eastern MBL	Takahe				98-103	trach	ArAr	nm-108	50377-01	ano (L)	Plateau	0.0164073	±	0.00276333		0.0164073	±	0.00276333	Upper sequence, matrix-rich pillow hyaloclastite, pillow interior	21	this study	no correction
		Eastern MBL	Takahe						ArAr									0.0175	±	0.0048	Mean age (n=2)	21	this study	no correction
-76.3814	-112.191	Eastern MBL	Takahe				98-110	trach	ArAr	nm-108	50389-01	ano (L)	Plateau	0.0406809	±	0.0107156		0.0406809	±	0.0107156	lower part of pillow hyaloclastite from W side	21	this study	no correction
-76.3844	-112.194	Eastern MBL	Takahe				98-113-1	trach	ArAr	nm-108	50365-01	ano (L)	Plateau	0.0342948	±	0.0136772		0.0342948	±	0.0136772	lower sequence, pillow hyaloclastite from E side	21	this study	no correction
-76.3844	-112.194	Eastern MBL	Takahe				98-113-2	trach	ArAr	nm-108	50365-02	ano (L)	Plateau	0.03628	±	0.00915745		0.03628	±	0.00915745	lower sequence,pillow hyaloclastite from E side	21	this study	no correction
-76.3844	-112.194	Eastern MBL	Takahe				98-113-4	trach	ArAr	nm-108	50365-04	ano (L)	Plateau	0.0375937	±	0.0039603		0.0375937	±	0.0039603	lower sequence,pillow hyaloclastite from E side	21	this study	no correction
-76.3844	-112.194	Eastern MBL	Takahe				98-113	trach	ArAr	nm-108	50365	ano (L)						0.0371827	±	0.00703	Mean age (n=3)	21	this study	no correction
-76.3849	-112.196	Eastern MBL	Takahe				98-115	trach	ArAr	nm-108	50376-01	ano (L)	Plateau	0.0283918	±	0.00745775		0.0283918	±	0.00745775	lower sequence,pillow hyaloclastite from E side	21	this study	no correction
		Eastern MBL	Takahe						ArAr									0.03446	±	0.00923	Mean age (n=3)			no correction
		Eastern MBL	Toney		Toney Mountain
-75.8297	-115.12	Eastern MBL	Toney				80	haw	KAr			wr		9.1	±	1.2		9.1	±	1.2	Cox Bluff- horizontal lava flows	9	LeMasurier et al. (1990c)	no correction
-75.8297	-115.12	Eastern MBL	Toney				80	haw	KAr			wr		10.1	±	1.2		10.1	±	1.2	Cox Bluff- horizontal lava flows	9	LeMasurier et al. (1990c)	no correction
-75.8297	-115.12	Eastern MBL	Toney				80	haw	KAr			wr						9.6	±	1	Mean age (n=2)			no correction
-75.7363	-115.668	Eastern MBL	Toney				76A	trach	KAr			wr		1	±	0.4		1	±	0.4	Zurn Peak, trachyte lava	9	LeMasurier et al. (1990c)	no correction
-75.8236	-115.955	Eastern MBL	Toney				75	ben	KAr			wr		0.5	±	0.2		0.5	±	0.2	unnamed outcrop at 2900 masl; flow rock	9	LeMasurier et al. (1990c)	no correction
		Eastern MBL	Toney				76D	com	F			glass		0.29	±	0.1		0.29	±	0.1	Zurn Peak, comendite	15	Seward et al. (1980)	no correction
				Crary Mountains Volcanic Field
		Crary Mountains	Rees		Mt. Rees
		Crary Mountains	Rees			Trabucco Cliff listed in stratigraphic order from top to bottom)
-76.6182	-118.036	Crary Mountains	Rees				92-174	trach	ArAr	NM-4	235	ano (L)	Weighted Mean	8.943	±	0.057		9.05896	±	0.057	N. end of cliff, lava flow top of section	18	Wilch and McIntosh (2002)	Convert FCs to 28.201	27.84
-76.6176	-118.033	Crary Mountains	Rees				92-175	trach	ArAr	NM-4	234	ano (L)	Weighted Mean	8.948	±	0.058		9.06403	±	0.058	N. end of cliff, lava flow top of section	18	Wilch and McIntosh (2002)	Convert FCs to 28.201	27.84
-76.6242	-118.015	Crary Mountains	Rees				92-6	trach	ArAr	NM-21	2152	ano (L)	Weighted Mean	8.975	±	0.068		9.09138	±	0.068	massive flow, above 92-15	18	Wilch and McIntosh (2002)	Convert FCs to 28.201	27.84
-76.6318	-118.014	Crary Mountains	Rees				92-15	trach	ArAr	NM-4	236	ano (L)	Weighted Mean	9.007	±	0.044		9.12379	±	0.044	lava flow middle of section	18	Wilch and McIntosh (2002)	Convert FCs to 28.201	27.84
-76.6235	-118.009	Crary Mountains	Rees				92-1	basn	ArAr	NM-13	1421	gms (F)	Selected Mean	9.13	±	0.53		9.24839	±	0.53	lobe hyaloclastite	18	Wilch and McIntosh (2002)	Convert FCs to 28.201	27.84
		Crary Mountains	Rees			Tasch Peak Ridge listed in stratigraphic order from top to bottom)
-76.6694	-118.047	Crary Mountains	Rees				92-36	phon	ArAr	NM-21	2154	ano (L)	Weighted Mean	7.521	±	0.059		7.61852	±	0.059	dike	18	Wilch and McIntosh (2002)	Convert FCs to 28.201	27.84
-76.6702	-118.025	Crary Mountains	Rees				92-38	basn	ArAr	NM-21	2538	gms (F)	Selected Mean	8.21	±	0.13		8.31646	±	0.13	2230m pillow hyaloclastite	18	Wilch and McIntosh (2002)	Convert FCs to 28.201	27.84
-76.6695	-118.037	Crary Mountains	Rees				92-34	mafic	ArAr	NM-13	1534	gms (F)	Selected Mean	8.23	±	0.087		8.33672	±	0.087	2269m intrusive hyaloclastite	18	Wilch and McIntosh (2002)	Convert FCs to 28.201	27.84
-76.6697	-118.023	Crary Mountains	Rees				92-41	mug	ArAr	NM-13	1424	gms (F)	Selected Mean	8.058	±	0.16		8.61022	±	0.16	hyaloclastite lobes	18	Wilch and McIntosh (2002)	Convert FCs to 28.201	27.84
-76.6686	-118.008	Crary Mountains	Rees				92-31	ph-teph.	ArAr	NM-13	1418	gms (F)	Selected Mean	8.98	±	0.28		9.09644	±	0.28	1844 pillow lobe interior	18	Wilch and McIntosh (2002)	Convert FCs to 28.201	27.84
-76.6686	-118.004	Crary Mountains	Rees				92-28	ben	ArAr	NM-13	1417	gms (F)	Plateau	9.075	±	0.064		9.19268	±	0.064	1817m spatter-fed lava	18	Wilch and McIntosh (2002)	Convert FCs to 28.201	27.84
-76.6688	-117.991	Crary Mountains	Rees				92-23	ben	ArAr	NM-13	1416	gms (F)	Selected Mean	8.91	±	0.12		9.02554	±	0.12	1739m pillow lobe	18	Wilch and McIntosh (2002)	Convert FCs to 28.201	27.84
-76.6604	-118.029	Crary Mountains	Rees				92-59	basn	ArAr	NM-13	1420	gms (F)	Selected Mean	9.34	±	0.24		9.46111	±	0.24	1643m lava flow	18	Wilch and McIntosh (2002)	Convert FCs to 28.201	27.84
		Crary Mountains	Rees			Isolated outcrops
-76.6864	-118.182	Crary Mountains	Rees				92-117	basn*	ArAr	NM-13	1402	gms (F)	Selected Mean	6.82	±	0.26		6.90843	±	0.26	SW of summit; eroded parasitic cone	18	Wilch and McIntosh (2002)	Convert FCs to 28.201	27.84
-76.9357	-116.961	Crary Mountains	Rees				92-114	basn*	ArAr	NM-13	1401	gms (F)	Selected Mean	6.92	±	0.21		7.00973	±	0.21	SW of summit; eroded parasitic cone	18	Wilch and McIntosh (2002)	Convert FCs to 28.201	27.84
-76.6483	-118.256	Crary Mountains	Rees				92-112	trach	ArAr	NM-21	2486	gms (F)	Selected Mean	9.02	±	0.19		9.13696	±	0.19	N end, Mt. Rees, lava flow, striae (240)	18	Wilch and McIntosh (2002)	Convert FCs to 28.201	27.84
-76.647	-118.266	Crary Mountains	Rees				92-109	trach	ArAr	NM-21	2487	gms (F)	Selected Mean	8.699	±	0.075		8.8118	±	0.075	N end, lava flow, striae (328)	18	Wilch and McIntosh (2002)	Convert FCs to 28.201	27.84
		Crary Mountains
		Crary Mountains	Steere		Mt. Steere
		Crary Mountains	Steere			Outcrops on west, north and northeast sides
-76.6999	-117.935	Crary Mountains	Steere				92-118	phon	ArAr	NM-21	2165	ano (L)	Weighted Mean	7.547	±	0.054		7.64486	±	0.054	flow banded lava, W of summit	18	Wilch and McIntosh (2002)	Convert FCs to 28.201	27.84
-76.6926	-117.839	Crary Mountains	Steere				92-95	mug	ArAr	NM-21	2493	gms (F)	Plateau	5.735	±	0.042		5.80937	±	0.042	flow banded lava clast from moraine, base of north side	18	Wilch and McIntosh (2002)	Convert FCs to 28.201	27.84
-76.6926	-117.839	Crary Mountains	Steere				92-64	phon	ArAr	NM-13	1535	gms (F)	Selected Mean	8.058	±	0.076		8.16249	±	0.076	dike, NE outcrop	18	Wilch and McIntosh (2002)	Convert FCs to 28.201	27.84
-76.6926	-117.839	Crary Mountains	Steere				92-53	trach	ArAr	NM-21	2156	ano (L)	Weighted Mean	8.235	±	0.083		8.34178	±	0.083	lava flow dome, NE outcrop	18	Wilch and McIntosh (2002)	Convert FCs to 28.201	27.84
-76.6926	-117.839	Crary Mountains	Steere				92-93	trach	ArAr	NM-21	2160	ano (L)	Weighted Mean	8.246	±	0.08		8.35293	±	0.08	dike, NE outcrop	18	Wilch and McIntosh (2002)	Convert FCs to 28.201	27.84
-76.6926	-117.839	Crary Mountains	Steere				92-63	trach	ArAr	NM-21	2157	ano (L)	Weighted Mean	8.271	±	0.076		8.37825	±	0.076	dike, NE outcrop	18	Wilch and McIntosh (2002)	Convert FCs to 28.201	27.84
-76.6926	-117.839	Crary Mountains	Steere				92-51	trach	ArAr	NM-21	2155	ano (L)	Weighted Mean	8.325	±	0.061		8.43295	±	0.061	lava flow, exposed plug, NE outcrop	18	Wilch and McIntosh (2002)	Convert FCs to 28.201	27.84
-76.697	-117.912	Crary Mountains	Steere				92-107	trach	ArAr	NM-21	2162	ano (L)	Weighted Mean	8.342	±	0.061		8.45017	±	0.061	dike, 2413m , N. arete	18	Wilch and McIntosh (2002)	Convert FCs to 28.201	27.84
-76.6997	-117.904	Crary Mountains	Steere				92-104	trach	ArAr	NM-21	2161	ano (L)	Weighted Mean	8.35	±	0.083		8.45827	±	0.083	flow banded lava, 2278m , N. arete	18	Wilch and McIntosh (2002)	Convert FCs to 28.201	27.84
-76.697	-117.912	Crary Mountains	Steere				92-108	trach	ArAr	NM-21	2164	ano (L)	Weighted Mean	8.368	±	0.056		8.47651	±	0.056	flow banded lava, 2413m	18	Wilch and McIntosh (2002)	Convert FCs to 28.201	27.84
-76.6997	-117.739	Crary Mountains	Steere				92-91	trach	ArAr	NM-21	2159	ano (L)	Weighted Mean	8.457	±	0.089		8.56666	±	0.089	flow banded lava, east side	18	Wilch and McIntosh (2002)	Convert FCs to 28.201	27.84
-76.6997	-117.739	Crary Mountains	Steere				92-181	phon	ArAr	NM-21	2173	ano (L)	Weighted Mean	7.91	±	0.2		8.01257	±	0.2	dike, fine grained, east side	18	Wilch and McIntosh (2002)	Convert FCs to 28.201	27.84
-76.6997	-117.739	Crary Mountains	Steere				92-182	rhyo	ArAr	NM-21	2196	ano (L)	Weighted Mean	8.523	±	0.06		8.63352	±	0.06	flow banded lava, east side	18	Wilch and McIntosh (2002)	Convert FCs to 28.201	27.84
-76.6997	-117.739	Crary Mountains	Steere				92-183	rhyo	ArAr	NM-21	2197	ano (L)	Weighted Mean	8.523	±	0.058		8.63352	±	0.058	flow banded lava, east side	18	Wilch and McIntosh (2002)	Convert FCs to 28.201	27.84
-76.6997	-117.739	Crary Mountains	Steere				92-178	trach	ArAr	NM-4	238	ano (L)	Weighted Mean	8.552	±	0.043		8.66289	±	0.043	flow banded lava, east side	18	Wilch and McIntosh (2002)	Convert FCs to 28.201	27.84
		Crary Mountains	Steere			Ridge SE of Lie Cliff (samples listed in stratigraphic order)
-76.7125	-117.552	Crary Mountains	Steere				92-169	bas	ArAr	NM-13	1415	gms (F)	Selected Mean	6.41	±	0.43		6.49312	±	0.43	SE ridge: 1814m lava flow	18	Wilch and McIntosh (2002)	Convert FCs to 28.201	27.84
-76.7125	-117.552	Crary Mountains	Steere				92-165	basn	ArAr	NM-13	1414	gms (F)	Selected Mean	7.378	±	0.072		7.47367	±	0.072	SE ridge: 1736m lava, near 92-162	18	Wilch and McIntosh (2002)	Convert FCs to 28.201	27.84
-76.7089	-117.547	Crary Mountains	Steere				92-162	bas	ArAr	NM-17	1883	gms (F)	Selected Mean	6.695	±	0.048		6.78181	±	0.048	SE ridge: 1736m lava, near 92-165	18	Wilch and McIntosh (2002)	Convert FCs to 28.201	27.84
		Crary Mountains	Steere			Lie Cliff (samples listed in stratigraphic order)
-76.7035	-117.593	Crary Mountains	Steere				92-80	trach	ArAr	NM-21	2158	ano (L)	Weighted Mean	7.818	±	0.056		7.91938	±	0.056	dike, 1.5 m wide	18	Wilch and McIntosh (2002)	Convert FCs to 28.201	27.84
-76.7035	-117.593	Crary Mountains	Steere				92-85	haw	ArAr	NM-13	1412	gms (F)	Selected Mean	8.38	±	0.33		8.48866	±	0.33	1631m lava flow	18	Wilch and McIntosh (2002)	Convert FCs to 28.201	27.84
-76.7035	-117.593	Crary Mountains	Steere				92-82	haw	ArAr	NM-13	1411	gms (F)	Selected Mean	8.28	±	0.21		8.38737	±	0.21	1600m hyaloclastite lobe	18	Wilch and McIntosh (2002)	Convert FCs to 28.201	27.84
-76.7035	-117.593	Crary Mountains	Steere				92-79	haw	ArAr	NM-21	2095	gms (F)	Plateau	8.435	±	0.061		8.54438	±	0.061	lowest subaerial lava- thin flows	18	Wilch and McIntosh (2002)	Convert FCs to 28.201	27.84
-76.7035	-117.593	Crary Mountains	Steere				92-86	haw	ArAr	NM-13	1413	gms (F)	Selected Mean	8.52	±	0.23		8.63048	±	0.23	1558m lava flow	18	Wilch and McIntosh (2002)	Convert FCs to 28.201	27.84
		Crary Mountains	Steere			Ridge NW of Lie Cliff (samples listed in stratigraphic order)
-76.6996	-117.601	Crary Mountains	Steere				92-89	trach	ArAr	NM-21	2172	ano (L)	Weighted Mean	7.676	±	0.061		7.77553	±	0.061	dike, intrudes entire section	18	Wilch and McIntosh (2002)	Convert FCs to 28.201	27.84
-76.6996	-117.601	Crary Mountains	Steere				92-193	haw	ArAr	NM-13	1406	gms (F)	Plateau	8.19	±	0.18		8.2962	±	0.18	1798m feeder dike, lava	18	Wilch and McIntosh (2002)	Convert FCs to 28.201	27.84
-76.6996	-117.601	Crary Mountains	Steere				92-192	phon	ArAr	NM-21	2174	ano (L)	Plateau	8.222	±	0.065		8.32861	±	0.065	feeder dike, lava	18	Wilch and McIntosh (2002)	Convert FCs to 28.201	27.84
-76.6996	-117.601	Crary Mountains	Steere				92-194	haw	ArAr	NM-13	1407	gms (F)	Selected Mean	8.19	±	0.22		8.2962	±	0.22	1753m glassy breccia	18	Wilch and McIntosh (2002)	Convert FCs to 28.201	27.84
-76.6996	-117.601	Crary Mountains	Steere				92-189	haw	ArAr	NM-13	1404	gms (F)	Selected Mean	8.45	±	0.46		8.55957	±	0.46	1747m glassy lava	18	Wilch and McIntosh (2002)	Convert FCs to 28.201	27.84
-76.6996	-117.601	Crary Mountains	Steere				92-190	haw	ArAr	NM-13	1405	gms (F)	Selected Mean	8.27	±	0.64		8.37724	±	0.64	1743m pillow lava	18	Wilch and McIntosh (2002)	Convert FCs to 28.201	27.84
-76.6996	-117.601	Crary Mountains	Steere				92-186	haw	ArAr	NM-13	1403	gms (F)	Plateau	8.4	±	0.11		8.50892	±	0.11	1646m subaerial lava	18	Wilch and McIntosh (2002)	Convert FCs to 28.201	27.84
		Crary Mountains
		Crary Mountains	Frakes		Mt. Frakes
		Crary Mountains	Frakes			Morrison Rocks
-76.8356	-117.627	Crary Mountains	Frakes				92-145	haw	ArAr	NM-13	1398	gms (F)	Selected Mean	1.81	±	0.1		1.83347	±	0.1	subaerial lava	18	Wilch and McIntosh (2002)	Convert FCs to 28.201	27.84
-76.839	-117.623	Crary Mountains	Frakes				92-142	haw	ArAr	NM-13	1397	gms (F)	Selected Mean	1.815	±	0.051		1.83854	±	0.051	subaerial lava	18	Wilch and McIntosh (2002)	Convert FCs to 28.201	27.84
-76.8534	-117.66	Crary Mountains	Frakes				92-128	haw	ArAr	NM-13	1395	gms (F)	Selected Mean	2.517	±	0.057		2.54964	±	0.057	subaerial lava	18	Wilch and McIntosh (2002)	Convert FCs to 28.201	27.84
-76.8635	-117.607	Crary Mountains	Frakes				92-125	haw	ArAr	NM-13	1394	gms (F)	Selected Mean	2.535	±	0.093		2.56787	±	0.093	subaerial lava	18	Wilch and McIntosh (2002)	Convert FCs to 28.201	27.84
-76.8487	-117.66	Crary Mountains	Frakes				92-130	haw	ArAr	NM-13	1396	gms (F)	Plateau	3.876	±	0.034		3.92626	±	0.034	subaerial lava	18	Wilch and McIntosh (2002)	Convert FCs to 28.201	27.84
-76.863	-117.649	Crary Mountains	Frakes				92-122	phon	ArAr	NM-4	237	ano (L)	Weighted Mean	4.17	±	0.045		4.22407	±	0.045	lava flow	18	Wilch and McIntosh (2002)	Convert FCs to 28.201	27.84
-76.8642	-117.643	Crary Mountains	Frakes				92-121	phon	ArAr	NM-21	2188	ano (L)	Weighted Mean	4.183	±	0.036		4.23724	±	0.036	lava flow	18	Wilch and McIntosh (2002)	Convert FCs to 28.201	27.84
-76.8534	-117.66	Crary Mountains	Frakes				92-127	phon	ArAr	NM-21	2173	ano (L)	Weighted Mean	4.251	±	0.032		4.30612	±	0.032	lava flow	18	Wilch and McIntosh (2002)	Convert FCs to 28.201	27.84
		Crary Mountains	Frakes															4.26	±	0.0524	Mean age (n=3)
		Crary Mountains	Frakes			English Rock
-76.827	-117.997	Crary Mountains	Frakes				92-151	basn	ArAr	NM-39	5621	gms (F)	Plateau	0.032	±	0.01		0.0324149	±	0.01	parasitic cone	18	Wilch and McIntosh (2002)	Convert FCs to 28.201	27.84
-76.827	-117.997	Crary Mountains	Frakes				92-151	basn	ArAr	NM-13	1391	gms (F)	Plateau	0.035	±	0.01		0.0354538	±	0.01	parasitic cone	18	Wilch and McIntosh (2002)	Convert FCs to 28.201	27.84
-76.827	-117.997	Crary Mountains	Frakes				92-151	basn	ArAr			gms (F)						0.0339344	±	0.01414	Mean age (n=2)
-76.8244	-117.958	Crary Mountains	Frakes				92-157	basn	ArAr	NM-17 1877	1877	gms (F)	Selected Mean	0.826	±	0.079		0.836711	±	0.079	parasitic cone	18	Wilch and McIntosh (2002)	Convert FCs to 28.201	27.84
-76.8244	-117.958	Crary Mountains	Frakes				92-157	basn	ArAr	NM-13	1392	gms (F)	Selected Mean	0.851	±	0.036		0.862035	±	0.036	parasitic cone	18	Wilch and McIntosh (2002)	Convert FCs to 28.201	27.84
-76.8244	-117.958	Crary Mountains	Frakes				92-157	basn	ArAr			gms (F)	Selected Mean					0.85768	±	0.06552	Mean age (n=2)
-76.8182	-117.966	Crary Mountains	Frakes				92-159	basn	ArAr	NM-13	1393	gms (F)	Selected Mean	1.598	±	0.021		1.61872	±	0.021	parasitic cone	18	Wilch and McIntosh (2002)	Convert FCs to 28.201	27.84
		Crary Mountains
		Crary Mountains	Boyd Ridge		Boyd Ridge
-76.9375	-116.558	Crary Mountains	Boyd Ridge				92-135a	haw	ArAr	NM-13	1400	gms (F)	Isochron	2.21	±	0.19		2.23866	±	0.19	W. Runyon Rock: juvenile clast from hyaloclastite	16	Wilch (1997)	Convert FCs to 28.201	27.84
-76.9375	-116.558	Crary Mountains	Boyd Ridge				92-135b	haw	ArAr	NM-13	1408	gms (F)	Isochron	1.97	±	0.3		1.99554	±	0.3	W. Runyon Rock: juvenile clast from hyaloclastite	16	Wilch (1997)	Convert FCs to 28.201	27.84
-76.9375	-116.558	Crary Mountains	Boyd Ridge				92-135	haw					mean					2.17	±	0.32	Mean age (n=2)
-76.9363	-116.546	Crary Mountains	Boyd Ridge				92-134	phon		NM-21	2189	ano (L)		2.019	±	0.049		2.04518	±	0.049	NE Runyon Rock, molded and polished clasts from debris flow	16	Wilch (1997)	Convert FCs to 28.201	27.84
-76.9357	-116.961	Crary Mountains	Boyd Ridge				92-139	ph-tph	ArAr	NM-13	1409	gms (F)	Plateau	1.272	±	0.027		1.28849	±	0.027	subaerial lava from north top side	16	Wilch (1997)	Convert FCs to 28.201	27.84
				Mount Siple Volcanic Field
		Siple	Siple		Mt. Siple
		Siple	Siple			Summit Caldera - shield building
-73.4198	-126.826	Siple	Siple				93-278	trach	ArAr	NM-32	5028	ano (L)	Weighted Mean	0.168928	±	0.00539622		0.171119	±	0.00539622	200 m below summiit lava	20	Wilch et al. (1999)	Convert FCs to 28.201	27.84
-73.4404	-126.781	Siple	Siple				93-277	trach	ArAr	NM-15	1871	ano (L)	Weighted Mean	0.22995	±	0.00666415		0.232932	±	0.00666415	caldera wall, densely welded fall, 20 m thick exposure	20	Wilch et al. (1999)	Convert FCs to 28.201	27.84
-73.4404	-126.781	Siple	Siple				93-277	trach	ArAr	NM-32	5025	ano (L)	Weighted Mean	0.233616	±	0.0172721		0.236645	±	0.0172721	caldera wall, densely welded fall, 20 m thick exposure	20	Wilch et al. (1999)	Convert FCs to 28.201	27.84
-73.4404	-126.781	Siple	Siple				93-277	trach	ArAr	NM-32	5026	ano (L)	Weighted Mean	0.222091	±	0.00692485		0.224971	±	0.00692485	caldera wall, densely welded fall, 20 m thick exposure	20	Wilch et al. (1999)	Convert FCs to 28.201	27.84
-73.4404	-126.781	Siple	Siple				93-277						Weighted Mean	0.2267	±	0.0076		0.22964	±	0.0076	Mean age (n=3)	20	Wilch et al. (1999)	Convert FCs to 28.201	27.84
		Siple	Siple			Flank depoosis post-shield builidng
-73.3051	-126.264	Siple	Siple				93-270	bas	ArAr	NM-34	5210	gms (F)	Plateau	0.736	±	0.036		0.745544	±	0.036	mid-flank, NE side, lithic clasts in lapilli tuff	16	Wilch (1997)	Convert FCs to 28.201	27.84
-73.5395	-127.442	Siple	Siple				93-275	haw	ArAr	NM-33	5156	gms (F)	Plateau	0.008	±	0.088		0.00810374	±	0.088	lithic clasts in lapilli tuff, Lovitt Bluff	16	Wilch (1997)	Convert FCs to 28.201	27.84
-73.5001	-127.41	Siple	Siple				W83-5*	bas	KAr			wr		2	±	1.4		2	±	1.4	lava	8	LeMasurier and Rex (1990a)	no correction needed
				Executive Committee Range Volcanic Field
		ECR	Hampton		Mt. Hampton
		ECR				Hampton caldera
-76.4982	-125.882	ECR	Hampton				20D*	phon	KAr			wr		8.6	±	1		8.6	±	1	near summit caldera	7	LeMasurier and Rex (1989)	no correction
-76.4805	-125.98	ECR	Hampton				22B*	basn	KAr			wr		10.1	±	0.8		10.1	±	0.8	west flank	7	LeMasurier and Rex (1989)	no correction
-76.4805	-125.98	ECR	Hampton				22D*	basn	KAr			wr		11.4	±	1.2		11.4	±	1.2	west flank	7	LeMasurier and Rex (1989)	no correction
-76.5271	-125.735	ECR	Hampton				25*	phon	KAr			wr		10.7	±	0.8		10.7	±	0.8	southeast flank	7	LeMasurier and Rex (1989)	no correction
-76.5167	-125.816	ECR	Hampton				90-201	phon	ArAr	RD84		ano (F)	Weighted Mean	10.94	±	0.04		11.0858	±	0.04	crystal-rich phonolite	21	this study	Convert FCs to 28.201	27.83
		ECR	Hampton				MB-74.2	phon	ArAr	RD84		ano (F)	Weighted Mean	11.28	±	0.04		11.4304	±	0.04	crystal-rich phonolite	21	this study	Convert FCs to 28.201	27.83
-76.5182	-125.898	ECR	Hampton				19C*	phon	KAr			wr		11.7	±	1		11.7	±	1	flow rock	7	LeMasurier and Rex (1989)	no correction
		ECR				Whitney Peak caldera
-76.4556	-126.062	ECR	Hampton				90-174	trach	ArAr	RD84		ano (F)	Weighted Mean	13.18	±	0.05		13.3557	±	0.05	phonolite	21	this study	Convert FCs to 28.201	27.83
-76.4416	-126.074	ECR	Hampton				23A*	ben	KAr			wr		13.4	±	1		13.4	±	1	flow rock	7	LeMasurier and Rex (1989)	no correction
-76.4373	-126.041	ECR	Hampton				24A*	trach	KAr			wr		13.7	±	1		13.7	±	1	flow rock	7	LeMasurier and Rex (1989)	no correction
-76.4416	-126.074	ECR	Hampton				23C*	trach	KAr			wr		13.7	±	1		13.7	±	1	flow rock	7	LeMasurier and Rex (1989)	no correction
		ECR
		ECR	Cumming		Mt. Cumming
-76.6964	-125.826	ECR	Cumming				28*	trach	KAr			wr		10.4	±	1		10.4	±	1	south flank, lava	7	LeMasurier and Rex (1989)	no correction
-76.6843	-125.727	ECR	Cumming				27*	trach	KAr			wr		10	±	1		10	±	1	near LaVaud Peak, lava	4	LeMasurier and Kawachi (1990b)	no correction
-76.6868	-125.895	ECR	Cumming				26A*	basn	KAr			wr		3	±	0.4		3	±	0.4	near Annexstad Peak, parasitic cone	4	LeMasurier and Kawachi (1990b)	no correction
		ECR
		ECR	Hartigan		Mt. Hartigan
-76.8324	-126.071	ECR	Hartigan				43A*	comendite	KAr			wr		6.02	±	0.5		6.02	±	0.5	N. caldera, lava	7	LeMasurier and Rex (1989)	no correction
-76.8737	-126.124	ECR	Hartigan				45C*	mug	KAr			wr		7.57	±	0.6		7.57	±	0.6	S. caldera, lava	7	LeMasurier and Rex (1989)	no correction
-76.8822	-126.11	ECR	Hartigan				46B*	mug	KAr			wr		7.86	±	1		7.86	±	1	S. caldera near Mintz, lava	7	LeMasurier and Rex (1989)	no correction
-76.8517	-125.999	ECR	Hartigan				48*	haw	KAr			wr		8.36	±	0.82		8.36	±	0.82	S. caldera, near Tusing, lava	7	LeMasurier and Rex (1989)	no correction
-76.8038	-126.092	ECR	Hartigan				42B*	trach	KAr			wr		8.5	±	0.66		8.5	±	0.66	N. caldera, lava	7	LeMasurier and Rex (1989)	no correction
		ECR
		ECR	Sidley		Mt. Sidley
		ECR	Sidley			Stage IV - post shield activity
-77.0972	-126.142	ECR	Sidley				K168	basn	ArAr	RD84		gms (F)	Plateau	4.18	±	0.08		4.23572	±	0.08	strombolian tephra and lava, parasitiic cone	12	Panter et al. (1994)	Convert FCs to 28.201	27.83
		ECR	Sidley			Stage III- formation of breached Sidley caldera
-77.1167	-126.062	ECR	Sidley				K85	mug-ben	ArAr	RD84		ano (F)	Plateau	4.31	±	0.06		4.36746	±	0.06	tuff cone deposits and lava, flank vent	12	Panter et al. (1994)	Convert FCs to 28.201	27.83
-77.0972	-126.142	ECR	Sidley				K51	trach	ArAr	RD84		ano (F)	Plateau	4.37	±	0.06		4.42826	±	0.06	unwelded ignimbrite, flank vent	12	Panter et al. (1994)	Convert FCs to 28.201	27.83
-77.075	-126.037	ECR	Sidley				K137	trach	ArAr			ano (F)	Plateau	4.25	±	0.06		4.30666	±	0.06	welded fall with fiamme, flank vent	12	Panter et al. (1994)	Convert FCs to 28.201	27.83
		ECR	Sidley			Stage II flank activity
-77.075	-126.242	ECR	Sidley				MB29.4	trach	ArAr	RD84		ano (F)	Plateau	4.53	±	0.04		4.59039	±	0.04	welded fall with abundant lithic fragments	12	Panter et al. (1994)	Convert FCs to 28.201	27.83
-77.0833	-125.925	ECR	Sidley				K105	tr-ben	ArAr			ano (F)	Plateau	4.55	±	0.08		4.61066	±	0.08	porphyritic lava and breccia from endogenous dome and commingled lava, flank vent	12	Panter et al. (1994)	Convert FCs to 28.201	27.83
-77.0972	-126.142	ECR	Sidley				K55	tr-ben	ArAr			ano (F)	Plateau	4.6	±	0.1		4.66132	±	0.1	porphyritic lava and breccia from endogenous dome and commingled lava, flank vent	12	Panter et al. (1994)	Convert FCs to 28.201	27.83
-77.075	-126.176	ECR	Sidley				MB33.3	tr-ben	ArAr	RD84		ano (F)	Plateau	4.58	±	0.04		4.64106	±	0.04	porphyritic lava and breccia from endogenous dome, flank vent	12	Panter et al. (1994)	Convert FCs to 28.201	27.83
-77.0736	-126.301	ECR	Sidley				MB35.5	tr-ph	ArAr	RD84		ano (F)	Plateau	4.45	±	0.02		4.50932	±	0.02	poorly welded pyroclastic fall, flank vent	12	Panter et al. (1994)	Convert FCs to 28.201	27.83
		ECR	Sidley			Stage I- Weiss caldera formed
-77.0375	-126.025	ECR	Sidley				K149	ph-tph	ArAr			ano (F)	Plateau	4.81	±	0.06		4.87412	±	0.06	vitric and porphyritic lava and basal breccia	12	Panter et al. (1994)	Convert FCs to 28.201	27.83
-77.0625	-126.186	ECR	Sidley				MB42.3	ph-tph	ArAr	RD84		ano (F)	Plateau	5.08	±	0.14		5.14772	±	0.14	vitric and porphyritic lava and basal breccia	12	Panter et al. (1994)	Convert FCs to 28.201	27.83
-77.0833	-125.925	ECR	Sidley				K106	phon	ArAr			ano (F)	Plateau	5.36	±	0.04		5.43145	±	0.04	lava and basal breccia	12	Panter et al. (1994)	Convert FCs to 28.201	27.83
-77.0833	-125.925	ECR	Sidley				K108	ph-tph	ArAr			ano (F)	Plateau	5.53	±	0.14		5.60372	±	0.14	porphyritic lava and breccia	12	Panter et al. (1994)	Convert FCs to 28.201	27.83
-77.075	-126.076	ECR	Sidley				K68	ph-tph	ArAr			ano (F)	Plateau	5.69	±	0.12		5.76585	±	0.12	porphyritic lava and breccia	12	Panter et al. (1994)	Convert FCs to 28.201	27.83
		ECR
		ECR	Waesche		Mt. Waesche
		ECR				Flank deposits
-77.2126	-126.924	ECR	Waesche				41A*	haw	KAr			wr		<0.1				<0.1	±	0	southwest flank	7	LeMasurier and Rex (1989)	no correction
-77.2032	-127.04	ECR	Waesche				35A*	ben	KAr			wr		0.17	±	0.6		0.17	±	0.6	southwest flank, cinder cone	7	LeMasurier and Rex (1989)	no correction
-77.2231	-127.024	ECR	Waesche				39A*	ben	KAr			wr		0.2	±	0.4		0.2	±	0.4	southwest flank	7	LeMasurier and Rex (1989)	no correction
-77.1986	-127.069	ECR	Waesche				33C*	haw	KAr			wr		1	±	0.2		1	±	0.2	southwest flank	7	LeMasurier and Rex (1989)	no correction
-77.2169	-126.899	ECR	Waesche						ArAr			gms(F)		0.48	±	0.02		0.486399	±	0.02	southwest flank, trachyte dome		Panter (1995)	Convert FCs to 28.201	27.83
		ECR
		ECR				Chang Peak caldera																					21
-77.0795	-126.667	ECR	Waesche				32A*	com	KAr			wr		1.6	±	0.4		1.6	±	0.4	Chang Peak, caldera wall	7	LeMasurier and Rex (1989)	no correction
							32A*	com	F					1.48	±	0.33		1.48	±	0.33	Chang Peak, caldera wall	15	Seward et al. (1980)	no correction
-77.0848	-127.041	ECR	Waesche					trach	ArAr			gms(F)		1.08	±	0.1		1.0944	±	0.1	Chang Peak, northwest flank lava	11	Panter (1995)	Convert FCs to 28.201	27.83
-77.0771	-126.969	ECR	Waesche						ArAr			gms(F)		1.98	±	0.1		2.0064	±	0.1	Chang Peak, northwest flank lava	11	Panter (1995)	Convert FCs to 28.201	27.83
		McCuddin Mountains		McCuddin Mountains Volcanic Field
		McCuddin Mountains	USAS		U.S.A.S. Escarpment
		McCuddin Mountains	USAS			Near Mt. Galla
-75.9499	-125.688	McCuddin Mountains	USAS				MB70.1	basn	ArAr	RD84		gms (F)	Isochron	26.06	±	0.21		26.3979	±	0.21	palagonitized lapilli tuff (tuff cone), 4 km east of Mt. Galla	16	Wilch (1997)	Convert FCs to 28.201	27.84
		McCuddin Mountains	USAS			Mt. Aldaz
-76.0463	-124.385	McCuddin Mountains	USAS				90-181	basn	ArAr	RD84	35	gms (F)	Isochron	18.8	±	1.4		19.0438	±	1.4	Mt. Aldaz, spatter lava over glacial unconformity and bedrock	16	Wilch (1997)	Convert FCs to 28.201	27.84
-76.0463	-124.385	McCuddin Mountains	USAS				90-180		ArAr	RD84		gms (F)	Plateau	19.43	±	0.31		19.6819	±	0.31	Mt. Aldaz, basanitic lava	16	Wilch (1997)	Convert FCs to 28.201	27.84
		McCuddin Mountains
		McCuddin Mountains	Flint		Mt. Flint
-75.7481	-129.194	McCuddin Mountains	Flint				93-279	bas	ArAr	NM-33	5157	gms (F)	Plateau	9.55	±	0.2		9.67383	±	0.2	SW parasitic cone, agglutinate lava	16	Wilch (1997)	Convert FCs to 28.201	27.84
-75.7343	-129.175	McCuddin Mountains	Flint				93-281	bas	ArAr	NM-33	5158	gms (F)	Plateau	3.7	±	0.063		3.74798	±	0.063	W upper parasitci cone, agglutinate lava	16	Wilch (1997)	Convert FCs to 28.201	27.84
-75.7368	-129.229	McCuddin Mountains	Flint				93-284	basn	ArAr	NM-33	5159	gms (F)	Plateau	8.55	±	0.24		8.66087	±	0.24	W lower parasitic cone agglutinate lava	16	Wilch (1997)	Convert FCs to 28.201	27.84
-75.6688	-129.314	McCuddin Mountains	Flint				93-288	syen	ArAr	NM-34	5194	ano (L)	Weighted Mean	20.192	±	0.096		20.4538	±	0.096	Reynolds Ridge, hypabbyssal lava	16	Wilch (1997)	Convert FCs to 28.201	27.84
-75.6698	-129.312	McCuddin Mountains	Flint				93-291	trach	ArAr	NM-34	5195	ano (L)	Weighted Mean	20.22	±	0.12		20.4822	±	0.12	Reynolds Ridge, lava, 20-25% fsp	16	Wilch (1997)	Convert FCs to 28.201	27.84
		McCuddin Mountains																20.46	±	0.0678	Mean Age (n=2)
		McCuddin Mountains	Petras		Mt. Petras
-75.8653	-128.673	McCuddin Mountains	Petras				93-323	mug	ArAr	NM-30	2841	gms (F)	Plateau	36.24	±	0.51		36.7099	±	0.51	SW flank, mugearite lava xenolith	17	Wilch and Mcintosh (2000)	Convert FCs to 28.201	27.84
-75.8652	-128.671	McCuddin Mountains	Petras				93-329	haw	ArAr	NM-30	2842	gms (F)	Plateau	27.18	±	0.23		27.5324	±	0.23	SW flank, dense haw SW saddlebomb interior	17	Wilch and Mcintosh (2000)	Convert FCs to 28.201	27.84
-75.8633	-128.676	McCuddin Mountains	Petras				93-343	haw	ArAr	NM-30	2717	gms (F)	Plateau	28.59	±	0.22		28.9607	±	0.22	aphyric haw lava, 2 m thick	17	Wilch and Mcintosh (2000)	Convert FCs to 28.201	27.84
-75.8628	-128.664	McCuddin Mountains	Petras				93-337	haw		NM-30	2714	gms (F)		27.9	±	0.38		28.2618	±	0.38	near summit, aphyric glassy haw lava, rare xenoliths	17	Wilch and Mcintosh (2000)	Convert FCs to 28.201	27.84
-75.8621	-128.652	McCuddin Mountains	Petras				93-332	mug	ArAr	NM-30	2716	gms (F)	Plateau	36.11	±	0.22		36.5782	±	0.22	near summit,massive mugearite lava	17	Wilch and Mcintosh (2000)	Convert FCs to 28.201	27.84
-75.8605	-128.647	McCuddin Mountains	Petras				93-333	haw	ArAr	NM-30	2715	gms (F)	Plateau	27.86	±	0.52		28.2213	±	0.52	near summit,dense haw bomb interior	17	Wilch and Mcintosh (2000)	Convert FCs to 28.201	27.84
		Ames Range		Ames Range Volcanic Field
		Ames Range	Andrus		Mt. Andrus
-75.8024	-132.543	Ames Range	Andrus				60*	basn	KAr			wr		<0.1				<0.1			u. Lind R., parasitic cone	6	LeMasurier and Rex (1983)	Decay constant- Dalrymple (1979)
-75.7466	-132.439	Ames Range	Andrus				41*	trach	KAr			wr		11.3	±	0.8		11.3	±	0.8	n. Rosenburg Gl.	7	LeMasurier and Rex (1989)	no correction needed
-75.7509	-132.406	Ames Range	Andrus				44*	mug	KAr			wr		11.3	±	0.8		11.6006	±	0.8	n. Rosenburg Gl.parasitic cone	6	LeMasurier and Rex (1983)	Decay constant- Dalrymple (1979)
-75.8111	-132.644	Ames Range	Andrus				93-308	basn	ArAr	NM-33	5163	gms (F)	Plateau	9.163	±	0.063		9.28182	±	0.063	lava, parasitic cone	16	Wilch (1997)	Convert FCs to 28.201	27.84
-75.8002	-132.615	Ames Range	Andrus				93-309	trach	ArAr	NM-33	5197	ano (L)	Plateau	12.552	±	0.062		12.7148	±	0.062	pumiceous lava, massive	16	Wilch (1997)	Convert FCs to 28.201	27.84
-75.8014	-132.599	Ames Range	Andrus				93-311	trach	ArAr	NM-34	5225	ano (L)	Plateau	11.045	±	0.082		11.1882	±	0.082	pumiceous lava	16	Wilch (1997)	Convert FCs to 28.201	27.84
-75.8009	-132.594	Ames Range	Andrus				93-312	trach	ArAr	NM-34	5226	ano (L)	Plateau	11.04	±	0.19		11.1832	±	0.19	pumiceous lava	16	Wilch (1997)	Convert FCs to 28.201	27.84
		Ames Range																11.19	±	0.08	Mean age (n=2)
		Ames Range	Kosciusko		Mt. Kosciusko
-75.7	-132.494	Ames Range	Kosciusko				40B*	ph-trach	KAr			wr		10	±	0.8		10	±	0.8	parasitic cone	2	LeMasurier (1990a)	no correction needed
-75.7	-132.494	Ames Range	Kosciusko				40B*	n.d.	KAr			wr		8.66	±	0.7		8.66	±	0.7	parasitic cone	2	LeMasurier (1990a)	no correction needed
		Ames Range																9.2	±	1.3	Mean age (n=2)
		Ames Range	Kauffman		Mt. Kauffman
-75.6031	-132.526	Ames Range	Kauffman				67B-8*	phon	KAr			wr		5.7	±	1		5.85	±	1	lava	6	LeMasurier and Rex (1983)	Decay constant- Dalrymple (1979)
-75.6031	-132.526	Ames Range	Kauffman				AR39B*	phon	KAr			wr		7.6	±	0.6		7.6	±	0.6	lava	7	LeMasurier and Rex (1989)	no correction needed
																		7.14	±	1.5	Mean age (n=2)
		Hobbs Coast		Hobbs Coast Volcanic Field
		Hobbs Coast	Shepard		Shepard Island and nearby islands
		Hobbs Coast	Shepard			Shepard Island
-74.3803	-132.558	Hobbs Coast	Shepard				93-255	basn	ArAr	NM-34	5204	gms (F)	Plateau	0.475	±	0.049		0.481159	±	0.049	lava flow interior, ponded flows in Mathewson Pt. tuff cone	16	Wilch (1997)	Convert FCs to 28.201	27.84
-74.3803	-132.558	Hobbs Coast	Shepard				93-258	basn	ArAr	NM-34	5206	gms (F)	Plateau	0.55	±	0.14		0.557132	±	0.14	lava clast from within tuff beds, Mathewson Pt.	16	Wilch (1997)	Convert FCs to 28.201	27.84
-74.402	-132.705	Hobbs Coast	Shepard				93-265	haw	ArAr	NM-34	5208	gms (F)	Plateau	0.4	±	0.09		0.405187	±	0.09	Mt. Petinos, lithic clast in tuff beds	16	Wilch (1997)	Convert FCs to 28.201	27.84
-74.4066	-132.778	Hobbs Coast	Shepard				S9F	trach	KAr			wr		0.42	±	1.2		0.43	±	0.12	Worley Pt. platy lava	6	LeMasurier and Rex (1983)	Decay constant- Dalrymple (1979)
		Hobbs Coast	Grant			Grant Island
-74.4547	-131.837	Hobbs Coast	Grant				GI11E	ben	KAr			wr		0.7	±	0.2		0.7	±	0.2	hyaloclastite from tuff cone	6	LeMasurier and Rex (1983)	Decay constant- Dalrymple (1979)
		Hobbs Coast	Cruzen			Cruzen Island
-74.7343	-140.327	Hobbs Coast	Cruzen				CI51C	bas	KAr			wr		2.68	±	0.26		2.75	±	0.26	subaerial basalt top of tuya	6	LeMasurier and Rex (1983)	Decay constant- Dalrymple (1979)
		Hobbs Coast
		Hobbs Coast	HCN		Inland Nunataks
		Hobbs Coast	HCN			Coleman Nunatak
-75.3116	-133.619	Hobbs Coast	HCN				93-199	basn	ArAr	NM-33	5152	gms (F)	Plateau	2.55	±	0.064		2.56647	±	0.064	S moat, dense lava, below upper surge deposit	19	Wilch and McIntosh (2007)	Convert FCs to 28.201	28.02
-75.3107	-133.629	Hobbs Coast	HCN				93-185	haw	ArAr	NM-33	5146	gms (F)	Plateau	2.62	±	0.28		2.63692	±	0.28	lava, SW moat	19	Wilch and McIntosh (2007)	Convert FCs to 28.201	28.02
-75.3127	-133.63	Hobbs Coast	HCN				93-184	basn	ArAr	NM-33	5149	gms (F)	Plateau	2.68	±	0.14		2.69731	±	0.14	lava, SW moat	19	Wilch and McIntosh (2007)	Convert FCs to 28.201	28.02
-75.3118	-133.622	Hobbs Coast	HCN				93-192	basn	ArAr	NM-33	5148	gms (F)	Plateau	2.59	±	0.2		2.60673	±	0.2	lava, SW moat	19	Wilch and McIntosh (2007)	Convert FCs to 28.201	28.02
-75.3133	-133.621	Hobbs Coast	HCN				93-188	basn	ArAr	NM-33	5147	gms (F)	Plateau	2.47	±	0.12		2.48596	±	0.12	basal lava flow SW moat	19	Wilch and McIntosh (2007)	Convert FCs to 28.201	28.02
-75.3062	-133.64	Hobbs Coast	HCN				93-208	basn	ArAr	NM-33	5132	gms (F)	Plateau	2.57	±	0.12		2.5866	±	0.12	N end, clast w/in scoriaceous dike	19	Wilch and McIntosh (2007)	Convert FCs to 28.201	28.02
-75.3062	-133.64	Hobbs Coast	HCN				93-207	basn	ArAr	NM-33	5155	gms (F)	Plateau	2.6	±	0.09		2.6168	±	0.09	N end, dike	19	Wilch and McIntosh (2007)	Convert FCs to 28.201	28.02
-75.3057	-133.64	Hobbs Coast	HCN				93-205	basn	ArAr	NM-33	5154	gms (F)	Plateau	2.77	±	0.27		2.78789	±	0.27	N end, dike	19	Wilch and McIntosh (2007)	Convert FCs to 28.201	28.02
-75.3044	-133.644	Hobbs Coast	HCN				93-202	basn	ArAr	NM-33	5153	gms (F)	Plateau	2.82	±	0.23		2.83822	±	0.23	N end, dike	19	Wilch and McIntosh (2007)	Convert FCs to 28.201	28.02
		Hobbs Coast	HCN											2.58	±	0.08		2.59667	±	0.08	Mean (n=9)				28.02
		Hobbs Coast	HCN			Cousins Rock
-75.2612	-133.524	Hobbs Coast	HCN				93-218	ph-tph	ArAr	NM-33	5133	gms (F)	Plateau	4.89	±	0.1		4.92159	±	0.1	bomb	19	Wilch and McIntosh (2007)	Convert FCs to 28.201	28.02
-75.2612	-133.524	Hobbs Coast	HCN				93-219	ph-tph	ArAr	NM-33	5134	gms (F)	Plateau	4.93	±	0.105		4.96185	±	0.105	lava	19	Wilch and McIntosh (2007)	Convert FCs to 28.201	28.02
		Hobbs Coast	HCN											4.91	±	0.07		4.94	±	0.14	Mean (n=2)				28.02
		Hobbs Coast	HCN			Shibuya Peak
-75.1653	-133.556	Hobbs Coast	HCN				93-221	haw	ArAr	NM-33	5135	gms (F)	Plateau	5.04	±	0.14		5.07256	±	0.14	bomb, small outcrop near Shibuya	19	Wilch and McIntosh (2007)	Convert FCs to 28.201	28.02
-75.163	-133.621	Hobbs Coast	HCN				93-223	haw	ArAr	NM-33	5136	gms (F)	Plateau	5.32	±	0.2		5.35437	±	0.2	lava crusts, Shibuya	19	Wilch and McIntosh (2007)	Convert FCs to 28.201	28.02
-75.166	-133.628	Hobbs Coast	HCN				93-229	haw	ArAr	NM-33	5137	gms (F)	Plateau	4.77	±	0.11		4.80081	±	0.11	dike, Shibuya	19	Wilch and McIntosh (2007)	Convert FCs to 28.201	28.02
		Hobbs Coast	HCN											4.94	±	0.29		4.98	±	0.29	Mean (n=2)				28.02
		Hobbs Coast	HCN			Patton Bluff
-75.213	-133.691	Hobbs Coast	HCN				93-307	bas	ArAr	NM-33	5162	gms (F)	Plateau	11.38	±	0.234		11.4535	±	0.234	lava, 15 m thick	19	Wilch and McIntosh (2007)	Convert FCs to 28.201	28.02
		Hobbs Coast	HCN			Kouperov Pk
-75.1039	-133.767	Hobbs Coast	HCN				93-303	bas	ArAr	NM-34	5212	gms (F)	Isochron	9.3	±	0.48		9.36007	±	0.48	S. end, lava over u.c.	19	Wilch and McIntosh (2007)	Convert FCs to 28.201	28.02
-75.1039	-133.767	Hobbs Coast	HCN				93-303	bas	ArAr	NM-34	5213	plg (F)	Isochron	9.18	±	0.056		9.2393	±	0.056	S. end, lava over u.c.	19	Wilch and McIntosh (2007)	Convert FCs to 28.201	28.02
														9.18	±	0.11		9.24	±	0.11	Mean (n=2)
-75.1003	-133.786	Hobbs Coast	HCN				93-304	bas	ArAr	NM-34	5214	gms (F)	Isochron	9.16	±	0.75		9.21917	±	0.75	lava	19	Wilch and McIntosh (2007)	Convert FCs to 28.201	28.02
-75.1003	-133.786	Hobbs Coast	HCN				93-304	bas	ArAr	NM-34	5215	plg (F)	Plateau	8.99	±	0.31		9.04807	±	0.31	lava	19	Wilch and McIntosh (2007)	Convert FCs to 28.201	28.02
														9.01	±	0.57		9.07	±	0.57	Mean (n=2)
		Hobbs Coast	HCN											9.17	±	0.22		9.26949	±	0.22	Mean (n=2) of sample means of 303 and 304
		Hobbs Coast	HCN			Kennel Pk
		Hobbs Coast					93-297		ArAr	NM-33	5238	gms (F)	Plateau	7.96	±	0.874		8.01142	±	0.874	pillow lobe interior, over till and striated bedrock	19	Wilch and McIntosh (2007)	Convert FCs to 28.201	28.02
		Hobbs Coast	HCN			Holmes Bluff		bas				wr
-75.0933	-133.764	Hobbs Coast	HCN				93-299	basn	ArAr	NM-33	5160	gms (F)	Plateau	6.32	±	0.07		6.36083	±	0.07	lava filling valley	19	Wilch and McIntosh (2007)	Convert FCs to 28.201	28.02
-74.976	-133.701	Hobbs Coast	HCN				50		KAr					8.17	±	0.66		8.38732		0.66	subaerial lava at S end	6	LeMasurier and Rex (1983)	Convert FCs to 28.201	28.02
		Hobbs Coast	HCN			Bowyer Butte
-74.9575	-134.73	Hobbs Coast	HCN				57D		KAr	n.a.	n.a.	wr		9.56	±	1.8		9.82	±	1.8	5m basalt lava on hyaloclastite over glacially striated basement	6	LeMasurier and Rex (1983)	Decay constant- Dalrymple (1979)
		Flood Range		Flood Range Volcanic Field
		Flood Range	Bursey		Flood Range-Mt. Bursey
-76.0042	-133.145	Flood Range	Bursey				93-156	trach	ArAr	NM-34	5191	ano (L)	Weighted Mean	8.447	±	0.056		8.55653	±	0.056	Starbuck crater lava	16	Wilch (1997)	Convert FCs to 28.201	27.84
-75.9728	-133.056	Flood Range	Bursey				93-158	trach?	ArAr	NM-34	5192	ano (L)	Weighted Mean	0.244	±	0.033		0.247164	±	0.033	Syrstad Rock, bomb, not in situ	16	Wilch (1997)	Convert FCs to 28.201	27.84
-76.048	-135.87	Flood Range	Bursey				24	bas	KAr	NM-34	5193	wr		10.4	±	0.8		10.4	±	0.8	Syrstad Rock, lava	2	LeMasurier (1990e)
-76.048	-135.87	Flood Range	Bursey				93-160	trach	ArAr	NM-34	5193	ano (L)	Weighted Mean	9.951	±	0.06		10.08	±	0.06	Koerner Bluff, lava	16	Wilch (1997)	Convert FCs to 28.201	27.84
-76.0035	-133.01	Flood Range	Bursey				93-161	basn	ArAr	NM-33	5145	gms (F)	Weighted Mean	9.99	±	0.34		10.1195	±	0.34	Koerner Bluff, bomb	16	Wilch (1997)	Convert FCs to 28.201	27.84
-75.9894	-132.907	Flood Range	Bursey				29	trach	KAr			wr		9.31	±	0.74		9.31	±	0.74	felsic cone on caldera rim	3	LeMasurier (1990e)
-76.0104	-132.635	Flood Range	Bursey				28A	basn	KAr			wr		0.49	±	0.12		0.49	±	0.12	Hutt Peak parasitic cone	3	LeMasurier (1990e)
-76.0051	-132.69	Flood Range	Bursey				27	trach	KAr			wr		6.4	±	0.48		6.4	±	0.48	Heaps Rock, lava	3	LeMasurier (1990e)
		Flood Range
		Flood Range	Moulton		Flood Range-Mt. Moulton
-76.0467	-135.386	Flood Range	Moulton				93-146	haw	ArAr	NM-37	5402	gms (F)	Plateau	1.11	±	0.15		1.12439	±	0.15	Gawne Nunatak, bomb	16	Wilch (1997)	Convert FCs to 28.201	27.84
-76.0467	-135.386	Flood Range	Moulton				93-146	haw	ArAr	NM-33	5143	gms (F)	Plateau	0.99	±	0.1		1.00284	±	0.1	Gawne Nunatak, bomb	16	Wilch (1997)	Convert FCs to 28.201	27.84
-76.0467	-135.386	Flood Range					93-146	haw	ArAr				Weighted Mean	1.03	±	0.04		1.04336	±	0.04	Gawne Nunatak, bomb	16	Wilch (1997)	Convert FCs to 28.201	27.84
-76.0709	-134.731	Flood Range	Moulton				93-318	rhyo	ArAr	NM-34	5227	ano (L)	Weighted Mean	5.874	±	0.046		5.95017	±	0.046	Prahl Crag, obsidian welded fall	16	Wilch (1997)	Convert FCs to 28.201	27.84
-76.0709	-134.731	Flood Range	Moulton				2A	rhyo	F			glass		4.68	±	0.61		4.68	±	0.61	Prahl Crag	15	Seward et al. (1980)	no correction
-75.9824	-135.282	Flood Range	Moulton				93-345	trach	ArAr	NM-34	5228	ano (L)	Weighted Mean	3.98	±	0.14		4.03161	±	0.14	Edward's Spur, platy lava	16	Wilch (1997)	Convert FCs to 28.201	27.84
		Flood Range
		Flood Range	Berlin		Mt. Berlin
		Flood Range	Berlin			Summit Caldera trachyte deposits
-75.9959	-133.043	Flood Range	Berlin				93-16	trach	ArAr	NM-36	5364	ano (F)	Weighted Mean	0.0102656	±	0.00527488		0.0103987	±	0.00527488	fumarolic ice cave floor lava (tr)	20	Wilch et al. (1999)	Convert FCs to 28.201	27.84
-76.0502	-135.844	Flood Range	Berlin				93-25	trach	ArAr	NM-32	5014	ano (F)	Weighted Mean	0.018216	±	0.00578437		0.0184522	±	0.00578437	non-welded pumice fall	20	Wilch et al. (1999)	Convert FCs to 28.201	27.84
-76.0502	-135.844	Flood Range	Berlin				93-22	trach	ArAr	NM-36	5366	ano (F)	Weighted Mean	0.037	±	0.012		0.0374798	±	0.012	laminated pumice, top of upper welded unit	20	Wilch et al. (1999)	Convert FCs to 28.201	27.84
-76.0502	-135.844	Flood Range	Berlin				93-22	trach	ArAr	NM-32	5014	lm	Weighted Mean	0.027087	±	0.00308627		0.0274382	±	0.00308627	laminated pumice, top of upper welded unit	20	Wilch et al. (1999)	Convert FCs to 28.201	27.84
-76.0502	-135.844	Flood Range	Berlin				93-22	trach	ArAr	NM-36	5347	ano (F)	Weighted Mean	0.0251665	±	0.00314212		0.0254928	±	0.00314212	laminated pumice, top of upper welded unit	20	Wilch et al. (1999)	Convert FCs to 28.201	27.84
-76.0502	-135.844	Flood Range	Berlin				93-22	trach	ArAr				Weighted Mean	0.0265	±	0.0037		0.0268436	±	0.0037	Mean age (n=3)	20	Wilch et al. (1999)	Convert FCs to 28.201	27.84
-76.0506	-135.84	Flood Range	Berlin				93-17	trach?	ArAr	NM-36	5360	ano (F)	Weighted Mean	0.0250186	±	0.00589233		0.025343	±	0.00589233	pumiceous rheomorphic tuff, upper welded unit	20	Wilch et al. (1999)	Convert FCs to 28.201	27.84
-76.0509	-135.84	Flood Range	Berlin				93-21	trach?	ArAr	NM-36	5346	ano (F)	Weighted Mean	0.0276538	±	0.00365725		0.0280124	±	0.00365725	welded fall, below WCM93-22	20	Wilch et al. (1999)	Convert FCs to 28.201	27.84
-76.0509	-135.84	Flood Range	Berlin				93-21	trach?	ArAr	NM-36	5346-02	ano (F)	Weighted Mean	0.02433	±	0.0028694		0.0246455	±	0.0028694	welded fall, below WCM93-22	20	Wilch et al. (1999)	Convert FCs to 28.201	27.84
-76.0509	-135.84	Flood Range	Berlin				93-21	trach?	ArAr				Weighted Mean	0.0256	±	0.0039		0.025932	±	0.0039	Mean age (n=2)	20	Wilch et al. (1999)	Convert FCs to 28.201	27.84
-76.0533	-135.831	Flood Range	Berlin				93-23	trach	ArAr	NM-32	5015	ano (L)	Weighted Mean	0.034	±	0.013		0.0344409	±	0.013	east side, lower welded unit (tr)	20	Wilch et al. (1999)	Convert FCs to 28.201	27.84
-76.0533	-135.831	Flood Range	Berlin				93-23	trach	ArAr	NM-32	5015	ano (F)	Weighted Mean	0.0255286	±	0.00493464		0.0258596	±	0.00493464	east side, lower welded unit (tr)	20	Wilch et al. (1999)	Convert FCs to 28.201	27.84
-76.0533	-135.831	Flood Range	Berlin				93-23	trach	ArAr	NM-36	5363	ano (F)	Weighted Mean	0.0325428	±	0.0107878		0.0329647	±	0.0107878	east side, lower welded unit (tr)	20	Wilch et al. (1999)	Convert FCs to 28.201	27.84
-76.0518	-135.839	Flood Range	Berlin				93-23	trach	ArAr				Weighted Mean	0.0275	±	0.0064		0.0278566	±	0.0064	Mean age (n=3)	20	Wilch et al. (1999)	Convert FCs to 28.201	27.84
-76.0525	-135.892	Flood Range	Berlin				93-15	trach	ArAr	NM-32	5013	ano (L)	Weighted Mean	0.028	±	0.011		0.0283631	±	0.011	spatter lava with cognate xenoliths	20	Wilch et al. (1999)	Convert FCs to 28.201	27.84
-76.0525	-135.892	Flood Range	Berlin				93-15	trach	ArAr	NM-32	5013	ano (F)	Weighted Mean	0.0238072	±	0.00292896		0.0241159	±	0.00292896	spatter lava with cognate xenoliths	20	Wilch et al. (1999)	Convert FCs to 28.201	27.84
-76.0525	-135.892	Flood Range	Berlin				93-15	trach	ArAr	NM-36	5344	ano (F)	Weighted Mean	0.0258092	±	0.00423355		0.0261439	±	0.00423355	spatter lava with cognate xenoliths	20	Wilch et al. (1999)	Convert FCs to 28.201	27.84
-76.0525	-135.892	Flood Range	Berlin				93-15	trach					Weighted Mean	0.0246	±	0.0029		0.024919	±	0.0029	Mean age (n=3)	20	Wilch et al. (1999)	Convert FCs to 28.201	27.84
		Flood Range	Berlin											0.0103	±	0.0053		0.0104336	±	0.0053	fumarolic cave lava (n=1)	20	Wilch et al. (1999)	Convert FCs to 28.201	27.84
		Flood Range	Berlin											0.0182		0.0058		0.018436		0.0058	non welled pumice fall (n=1)	20	Wilch et al. (1999)	Convert FCs to 28.201	27.84
		Flood Range	Berlin										Weighted Mean	0.025524	±	0.002		0.025855	±	0.002	welded fall deposits (n=5)	20	Wilch et al. (1999)	Convert FCs to 28.201	27.84
		Flood Range
		Flood Range	Berlin			Merrem Peak caldera trachyte
-76.0454	-136.029	Flood Range	Berlin				93-130	trach	ArAr	NM-36	5367	ano (F)	Plateau	0.141423	±	0.00568497		0.143256	±	0.00568497	1 m thick pumiceous phonolite fall (nonwelded)	20	Wilch et al. (1999)	Convert FCs to 28.201	27.84
		Flood Range	Berlin																					Convert FCs to 28.201	27.84
-76.048	-136.027	Flood Range	Berlin				93-123	trach	ArAr	NM-15	1298	ano (L)	Weighted Mean	0.161	±	0.026		0.163088	±	0.026	black/yellow fall (SE)	20	Wilch et al. (1999)	Convert FCs to 28.201	27.84
-76.0432	-136.034	Flood Range	Berlin				93-128	trach	ArAr	NM-32	5012	ano (F)	Plateau	0.183807	±	0.00461098		0.18619	±	0.00461098	bomb (WNW)	20	Wilch et al. (1999)	Convert FCs to 28.201	27.84
-76.0436	-136.034	Flood Range	Berlin				93-129	trach	ArAr	NM-32	5007	ano (F)	Plateau	0.174	±	0.017		0.176256	±	0.017	pumiceous trachyte fall (NE)	20	Wilch et al. (1999)	Convert FCs to 28.201	27.84
-76.0436	-136.034	Flood Range	Berlin				93-129	trach	ArAr	NM-32	5008	ano (F)	Plateau	0.18527	±	0.00455939		0.187672	±	0.00455939	pumiceous fall (NE)	20	Wilch et al. (1999)	Convert FCs to 28.201	27.84
-76.0383	-136.026	Flood Range	Berlin				93-133	trach	ArAr				Weighted Mean	0.181946	±	0.00478538		0.184305	±	0.00478538	welded trachyte fall (NE)	20	Wilch et al. (1999)	Convert FCs to 28.201	27.84
-76.0383	-136.026	Flood Range	Berlin				93-133		ArAr	NM-32	5011	ano (F)	Plateau	0.190969	±	0.0075173		0.193445	±	0.0075173	welded trachyte fall (NE)	20	Wilch et al. (1999)	Convert FCs to 28.201	27.84
-76.0383	-136.026	Flood Range	Berlin				93-133		ArAr				Weighted Mean	0.1845	±	0.0091		0.186892	±	0.0091	Mean age (n=2)	20	Wilch et al. (1999)	Convert FCs to 28.201	27.84
-76.0335	-136.064	Flood Range	Berlin				93-139	trach	ArAr	NM-32	5001	ano (F)	Plateau	0.182076	±	0.00459613		0.184437	±	0.00459613	welded clastogenic flow	20	Wilch et al. (1999)	Convert FCs to 28.201	27.84
-76.0368	-136.059	Flood Range	Berlin				93-140	trach	ArAr	NM-36	5351	ano (F)	Plateau	0.179425	±	0.0137327		0.181752	±	0.0137327	welded clastogenic flow	20	Wilch et al. (1999)	Convert FCs to 28.201	27.84
		Flood Range	Berlin						ArAr				Weighted Mean	0.1414	±	0.0057		0.143234	±	0.0057	non-welded phonolite fall (n=1)	20	Wilch et al. (1999)	Convert FCs to 28.201	27.84
		Flood Range	Berlin						ArAr				Weighted Mean	0.183634	±	0.0029		0.186015	±	0.0029	welded trachyte fall deposit (n=5)	20	Wilch et al. (1999)	Convert FCs to 28.201	27.84
		Flood Range	Berlin
		Flood Range	Berlin			Flank trachyte deposits
-75.987	-135.92	Flood Range	Berlin				93-011	trach	ArAr	NM-37	5345	ano (F)	Plateau	0.231066	±	0.0105675		0.234062	±	0.0105675	near-vent trahyte lava (NE flank)	20	Wilch et al. (1999)	Convert FCs to 28.201	27.84
-76.1002	-135.939	Flood Range	Berlin				93-152	phon	ArAr	NM-36	5341	ano (F)	Plateau	0.228204	±	0.0116313		0.231163	±	0.0116313	Wedemeyer Rock, welded ignmibrite (SE)	20	Wilch et al. (1999)	Convert FCs to 28.201	27.84
		Flood Range	Berlin						ArAr				Weighted Mean	0.2298	±	0.0078		0.23278	±	0.0078	Flank trachyte deposits mean age (n=2)	20	Wilch et al. (1999)	Convert FCs to 28.201	27.84
		Flood Range	Berlin
		Flood Range	Berlin			Mefford Knoll- mafic deposits
-76.0056	-136.275	Flood Range	Berlin				93-001	basn	ArAr	NM-33	5138	gms (F)	Plateau	0.211461	±	0.0346249		0.214203	±	0.0346249	basanite cinder cone	20	Wilch et al. (1999)	Convert FCs to 28.201	27.84
-76.0056	-136.275	Flood Range	Berlin				93-001	basn	ArAr	NM-37	5397	gms (F)	Plateau	0.196848	±	0.0487088		0.199401	±	0.0487088	basanite cinder cone	20	Wilch et al. (1999)	Convert FCs to 28.201	27.84
-76.0056	-136.275	Flood Range	Berlin				93-001	basn	ArAr				Weighted Mean	0.207	±	0.031		0.209684	±	0.031	Mean age (n=2)	20	Wilch et al. (1999)	Convert FCs to 28.201	27.84
-76.0072	-136.251	Flood Range	Berlin				93-004	basn	ArAr	NM-33	5139	gms (F)	Plateau	0.212679	±	0.0284987		0.215436	±	0.0284987	basanite cinder cone	20	Wilch et al. (1999)	Convert FCs to 28.201	27.84
-76.0072	-136.251	Flood Range	Berlin				93-004	basn	ArAr	NM-37	5398	gms (F)	Plateau	0.213167	±	0.0363707		0.215931	±	0.0363707	basanite cinder cone	20	Wilch et al. (1999)	Convert FCs to 28.201	27.84
-76.0072	-136.251	Flood Range	Berlin				93-004	basn	ArAr				Weighted Mean	0.213	±	0.022		0.215762	±	0.022	Mean age (n=2)	20	Wilch et al. (1999)	Convert FCs to 28.201	27.84
-76.0043	-136.239	Flood Range	Berlin				93-008	haw	ArAr	NM-33	5140	gms (F)	Plateau	0.207269	±	0.0798268		0.209956	±	0.0798268	hawaiite flow levee	20	Wilch et al. (1999)	Convert FCs to 28.201	27.84
		Flood Range	Berlin										Weighted Mean	0.211	±	0.018		0.213736	±	0.018	Mefford Knoll mafic mean age (n=3)	20	Wilch et al. (1999)	Convert FCs to 28.201	27.84
		Flood Range	Berlin
		Flood Range	Berlin			Merrem Peak (SW) trachyte lava
-76.0625	-136.163	Flood Range	Berlin				93-134	trach	ArAr	NM-34	5186	ano (L)	Weighted Mean	0.45	±	0.175		0.455835	±	0.175	lava	20	Wilch et al. (1999)	Convert FCs to 28.201	27.84
-76.0465	-136.043	Flood Range	Berlin				93-127	trach	ArAr	NM-32	5029	ano (F)	Plateau	0.453963	±	0.0411047		0.45985	±	0.0411047	foliated lava	20	Wilch et al. (1999)	Convert FCs to 28.201	27.84
-76.0488	-136.026	Flood Range	Berlin				93-125	trach	ArAr	NM-32	5020	ano (F)	Plateau	0.572717	±	0.0152583		0.580144	±	0.0152583	foliated lava	20	Wilch et al. (1999)	Convert FCs to 28.201	27.84
-76.046	-136.042	Flood Range	Berlin				93-126	trach	ArAr	NM-32	5009	ano (F)	Plateau	0.565938	±	0.0124523		0.573277	±	0.0124523	clastogenic trachyte lava	20	Wilch et al. (1999)	Convert FCs to 28.201	27.84
-76.046	-136.042	Flood Range	Berlin				93-126	trach	ArAr	NM-32	5010	ano (F)	Plateau	0.563231	±	0.0130824		0.570534	±	0.0130824	clastogenic trachyte lava	20	Wilch et al. (1999)	Convert FCs to 28.201	27.84
		Flood Range	Berlin				93-126	trach	ArAr				Weighted Mean	0.5647	±	0.0094		0.572022	±	0.0094	Mean age (n=2)	20	Wilch et al. (1999)	Convert FCs to 28.201	27.84
-76.0417	-136.092	Flood Range	Berlin				93-137	trach	ArAr	NM-32	5023	ano (F)	Plateau	0.575767	±	0.0128958		0.583233	±	0.0128958	lava	20	Wilch et al. (1999)	Convert FCs to 28.201	27.84
-76.0392	-136.074	Flood Range	Berlin				93-138	trach	ArAr	NM-32	5030	ano (F)	Plateau	0.580285	±	0.0400813		0.587809	±	0.0400813	clastogenic lava	20	Wilch et al. (1999)	Convert FCs to 28.201	27.84
-76.0613	-136.169	Flood Range	Berlin				93-135	phon	ArAr	NM-34	5187	ano (L)	Weighted Mean	0.594	±	0.018		0.594	±	0.018	clastogenic phonolite	20	Wilch et al. (1999)	Convert FCs to 28.201	27.84
-76.0613	-136.169	Flood Range	Berlin				93-135	phon	ArAr	NM-34	5188	ano (L)	Weighted Mean	0.588	±	0.048		0.588	±	0.048	clastogenic phonolite	20	Wilch et al. (1999)	Convert FCs to 28.201	27.84
-76.0613	-136.169	Flood Range	Berlin				93-135	phon	ArAr	NM-36	5349	ano (F)	Plateau	0.560378	±	0.0201793		0.560378	±	0.0201793	clastogenic phonolite	20	Wilch et al. (1999)	Convert FCs to 28.201	27.84
		Flood Range	Berlin				93-135	phon	ArAr				Weighted Mean	0.579	±	0.036		0.586508	±	0.036	Mean age (n=3)	20	Wilch et al. (1999)	Convert FCs to 28.201	27.84
-76.0055	-136.253	Flood Range	Berlin				93-009	trach	ArAr	NM-33	5141	ano (F)	Plateau	0.589415	±	0.027804		0.597058	±	0.027804	trachyte flow levee (NW)	20	Wilch et al. (1999)	Convert FCs to 28.201	27.84
		Flood Range	Berlin						ArAr				Weighted Mean	0.454	±	0.04		0.459887	±	0.04	SW flank trachyte lava 2 (n=2)	20	Wilch et al. (1999)	Convert FCs to 28.201	27.84
		Flood Range	Berlin						ArAr				Weighted Mean	0.571021	±	0.0089		0.578425	±	0.0089	SW flank trachyte lava 1 (n=6)	20	Wilch et al. (1999)	Convert FCs to 28.201	27.84
		Flood Range
		Flood Range	Berlin			Brandenberger Bluff trachyte/phonolite tuya
-75.9767	-136.042	Flood Range	Berlin				93-014	ph-teph	ArAr	NM-34	5186	ano (F)	Plateau	2.67209	±	0.0673071		2.70674	±	0.0673071	phonotephrite cinder cone, upslope from bluff	20	Wilch et al. (1999)	Convert FCs to 28.201	27.84
-75.959	-136.092	Flood Range	Berlin				93-010	phon	ArAr	NM-34	5237	ano (F)	Plateau	2.76761	±	0.108938		2.8035	±	0.108938	phonolite dome lava	20	Wilch et al. (1999)	Convert FCs to 28.201	27.84
-75.9569	-136.056	Flood Range	Berlin				93-037	phon	ArAr	NM-34	5198	ano (F)	Plateau	2.82252	±	0.242165		2.85912	±	0.242165	fractured phonolite lava at bluff base	20	Wilch et al. (1999)	Convert FCs to 28.201	27.84
-75.9577	-136.062	Flood Range	Berlin				93-053	trach	ArAr	NM-34	5199	ano (F)	Plateau	2.72214	±	0.086284		2.75744	±	0.086284	trachyte clast in hyalotuff	20	Wilch et al. (1999)	Convert FCs to 28.201	27.84
-75.963	-136.02	Flood Range	Berlin				93-121	phon	ArAr	NM-34	5201	ano (F)	Plateau	2.75873	±	0.121134		2.7945	±	0.121134	phonolite clast in hyalotuff	20	Wilch et al. (1999)	Convert FCs to 28.201	27.84
-75.9615	-136.066	Flood Range	Berlin				93-250	trach	ArAr	NM-34	5186	ano (F)	Plateau	2.68427	±	0.126256		2.71908	±	0.126256	trachyte clast in hyalotuff	20	Wilch et al. (1999)	Convert FCs to 28.201	27.84
		Flood Range	Berlin						ArAr				Weighted Mean	2.738	±	0.063		2.7735	±	0.063	Brandenberger Bluff Mean Age (n=5)	20	Wilch et al. (1999)	Convert FCs to 28.201	27.84
				Fosdick Mountains Volcanic Field
		Fosdick	Fosdick			Mt. Perkins
-76.5058	144.17414	Fosdick	Fosdick				28	bas	KAr			wr		3.4	±	0.6		3.5	±	0.6		5	LeMasurier and Rex (1982)	Decay constant- Dalrymple (1979)
-76.5058	144.17414	Fosdick	Fosdick				30	bas	KAr			wr		4.6	±	1		4.7	±	1		5	LeMasurier and Rex (1982)	Decay constant- Dalrymple (1979)
-76.5058	144.17414	Fosdick	Fosdick				90207a	basn	ArAr	RD84		gms (F)	Plateau	1.39	±	0.04		1.40853	±	0.04	lava	21	this study	Convert FCs to 28.201	27.83
-76.5111	-144.149	Fosdick	Fosdick				90207b	basn	ArAr	RD84		gms (F)	Plateau	1.38	±	0.03		1.3984	±	0.03	lava	21	this study	Convert FCs to 28.201	27.83
																		1.4	±	0.05	Mean age (n=2)	21	this study
				Hudson Mountains Volcanic Field
		Hudson	Hudson			Velie Nunatak
-74.3963	-99.172	Hudson	Hudson				28·3A	bas	KAr			wr		3.6	±	0.4		3.69648	±	0.4	lava within hyaloclastite tuff sequence	5	LeMasurier and Rex (1982)	Decay constant- Dalrymple (1979)
		Hudson	Hudson			Mt. Manthe
-74.779	-99.3709	Hudson	Hudson				42·6A	bas	KAr			wr		4.9	±	0.6		5.03132	±	0.6	clasts from near top of 200 m hyaloclastite section	5	LeMasurier and Rex (1982)	Decay constant- Dalrymple (1979)
-74.779	-99.3709	Hudson	Hudson				42·5A	bas	KAr			wr		4.6	±	0.4		4.72328	±	0.4		5	LeMasurier and Rex (1982)	Decay constant- Dalrymple (1979)
-74.779	-99.3709	Hudson	Hudson				42·4A	bas	KAr			wr		5	±	0.6		5.134	±	0.6		5	LeMasurier and Rex (1982)	Decay constant- Dalrymple (1979)
-74.779	-99.3709	Hudson	Hudson				42	bas					Weighted Mean					4.9	±	0.6	Mean age (n=3)
-74.779	-99.3709	Hudson	Hudson				H·6	bas	KAr			wr		5.5	±	3.8		5.6463	±	3.8	subaerial cap of 200 m hyaloclastite section	5	LeMasurier and Rex (1982)	Decay constant- Dalrymple (1979)
-74.779	-99.3709	Hudson	Hudson				H-4	bas	KAr			wr		8.5	±	2		8.7261	±	2	clast within hyaloclastite roughly 50 m below top	5	LeMasurier and Rex (1982)	Decay constant- Dalrymple (1979)
-74.779	-99.3709	Hudson	Hudson				H-2	bas	KAr			wr		4.9	±	3.2		5.03132	±	3.2	lava in middle of hyaloclastite tuff section	5	LeMasurier and Rex (1982)	Decay constant- Dalrymple (1979)
				Jones Mountains Volcanic Field
-73.5068	-94.3427	Jones	Jones					bas	ArAr			gms (F)	Plateau	7.63	±	0.11		7.67929	±	0.11	lava above basal pillows and unconformity from peak west of Forbidden Peak	14	Rutford and McIntosh (2007)	Convert FCs to 28.201	28.02
																							345

## Sheet: Notes for Supplementary Data
	Notes
Column A-B:	Latitude and Longitude for 40Ar/39Ar sample locations (except Mount Takahe) are based on identification of localities on Google Earth imagery. Original locations were mostly on air photos and some were on USGS topographic maps, and field notes. Mount Takahe sample locations are based on field GPS determinations. KAr sample lcoations are based on transferring outcrop locations from maps in LeMasur…
Column C:	Volcanic Field names are defined in the text.
Column D:	Volcano/Region refers to specific volcanoes described in the volcano summaries; section is organized generally from eastern MBL to western MBL, as in text of paper. Thurston Island Volanic Province volcanic fields are presented after the MBL Volcanic Province fields.
Column H:	Sample I.D.s according to sources or field notes, for previously unpublished results.
	type: rock name classified by Total-Alkali Silica content based on LeMaitre et al. (2002). Geochemical data for all MBL samples are presented and summarized in Panter et al. (this volume). Abbreviations: bas (basalt); basn (basanite); ben (benmoreite); com (comendite); haw (hawaiite); mug (mugearite); phon (phonolite); ph-tph (phonotephrite); rhyo (rhyolite); trach or tr (trachyte).
Column J:	Technique: ArAr refers to 40Ar/39Ar method; Kar refers to conventional K/Ar method.																		Mean (Plateau)		%39Ar	n	%39Ar	MSWD	K/Ca	40Ar/36Ar	±	2s	d		Published Preferred				Corrected Preferred			Description	Ref.	Ref	Age Correction Method	Original FCs age in calculation
Column K, L:	Irrad# is the irradition package identifier for samples dated at the New Mexico Geochronology Research Laboratory. NMGRL Lab# is the analysis identifier for samples dated at the New Mexico Geochronology Research Laboratory.
Column M:	sample (meth.) describes the dating sample and the method by which it was dated. Abbreviations: gms (groundmass); wr (whole-rock); ano (anorthoclase); bio (biotite); amph (amphibole); (F) sample heated in furnace; (L) sample heated by CO2 laser.
Column N:	Type refers to the statistical method used to calculate the preferred age. Plateau refers to calculated ages that meet plateau criteria, according to Fleck et al. (1977) or Mahon (1996). Weighted mean ages do not meet plateau criteria. Isochron refers to isotope correlation ages determined on a plot of 36Ar/40Ar versus 39Ar/40Ar for analysis steps.
Column O-U:	Published Preferred Age is the best estimate of sample age. Corrected Preferrred Ages differ from Preferred Ages in cases where the values of the decay or standard constants have channged. Many of the 40Ar/39Ar ages relied on the use of Fish Canyon sandine irradiition standard, the age of which has been updated over time. Original FCs standard ages used in previous studies and the age correction …
W-X	Reference and Reference code used in table 3-12.
Y-Z	Y is age correction method applied. Z is the FCs age (Ma) used in original publication/analysis.

## Sheet: Ref Code
Code	Ref
1	LeMasurier (1972)
2	LeMasurier (1990a)
3	LeMasurier (1990e)
4	LeMasurier and Kawachi (1990b)
5	LeMasurier and Rex (1982)
5	LeMasurier and Rex (1982)
6	LeMasurier and Rex (1983)
7	LeMasurier and Rex (1989)
8	LeMasurier and Rex (1990a)
9	LeMasurier et al. (1990c)
10	Palais et al. (1988)
11	Panter (1995)
12	Panter et al. (1994)
13	Rocchi et al. (2006)
14	Rutford and McIntosh (2007)
15	Seward et al. (1980)
16	Wilch (1997)
17	Wilch and Mcintosh (2000)
18	Wilch and McIntosh (2002)
19	Wilch and McIntosh (2007)
20	Wilch et al. (1999)
21	this study
	Panter (1995)
	Panter (1995)
	Panter (1995)
	345
